# Supplementary material for: Individual cartoon video for alleviating perioperative anxiety and reducing emergence delirium in children: a prospective randomised trial
Source: PubMed Central journal article supplement — BMJ Paediatr Open. 2023 Jul 5;7(1):e001854. doi: 10.1136/bmjpo-2023-001854 (PMC10335578; doi:10.1136/bmjpo-2023-001854), 2023-07-05
Supplement: bmjpo-2023-001854.draft_revisions.pdf [file bmjpo-2023-001854.draft_revisions.pdf]

# BMJ Paediatrics Open

BMJ Paediatrics Open is committed to open peer review. As part of this commitment we make the peer review history of every article we publish publicly available.

When an article is published we post the peer reviewers' comments and the authors' responses online. We also post the versions of the paper that were used during peer review. These are the versions that the peer review comments apply to.

The versions of the paper that follow are the versions that were submitted during the peer review process. They are not the versions of record or the final published versions. They should not be cited or distributed as the published version of this manuscript.

BMJ Paediatrics Open is an open access journal and the full, final, typeset and author-corrected version of record of the manuscript is available on our site with no access controls, subscription charges or pay-per-view fees (<http://bmjpaedsopen.bmj.com>).

If you have any questions on BMJ Paediatrics Open's open peer review process please email [info.bmjpo@bmj.com](mailto:info.bmjpo@bmj.com)

# BMJ Paediatrics Open

## Individual Cartoon Video for Alleviating Perioperative Anxiety and Reducing Emergence Delirium in Children: A Prospective Randomized Trial

|                               |                                                                                                                                                                                                                                                                                                                                                                                                                                                                                                                                                                                                                                                                                                                                                                                                                                                                                                                                                                                                                                                                                 |
|-------------------------------|---------------------------------------------------------------------------------------------------------------------------------------------------------------------------------------------------------------------------------------------------------------------------------------------------------------------------------------------------------------------------------------------------------------------------------------------------------------------------------------------------------------------------------------------------------------------------------------------------------------------------------------------------------------------------------------------------------------------------------------------------------------------------------------------------------------------------------------------------------------------------------------------------------------------------------------------------------------------------------------------------------------------------------------------------------------------------------|
| Journal:                      | <i>BMJ Paediatrics Open</i>                                                                                                                                                                                                                                                                                                                                                                                                                                                                                                                                                                                                                                                                                                                                                                                                                                                                                                                                                                                                                                                     |
| Manuscript ID                 | bmjpo-2023-001854                                                                                                                                                                                                                                                                                                                                                                                                                                                                                                                                                                                                                                                                                                                                                                                                                                                                                                                                                                                                                                                               |
| Article Type:                 | Original research                                                                                                                                                                                                                                                                                                                                                                                                                                                                                                                                                                                                                                                                                                                                                                                                                                                                                                                                                                                                                                                               |
| Date Submitted by the Author: | 12-Jan-2023                                                                                                                                                                                                                                                                                                                                                                                                                                                                                                                                                                                                                                                                                                                                                                                                                                                                                                                                                                                                                                                                     |
| Complete List of Authors:     | <p>Tang, Xinyu; The Second Hospital of Anhui Medical University, Department of Anesthesiology; Key Laboratory of Anesthesiology and Perioperative Medicine of Anhui Higher Education Institutes, Anhui Medical University</p> <p>Zhang, Muchun; The Second Hospital of Anhui Medical University, Department of Anesthesiology; Key Laboratory of Anesthesiology and Perioperative Medicine of Anhui Higher Education Institutes, Anhui Medical University</p> <p>Yang, Lizhuang; Anhui Province Key Laboratory of Medical Physics and Technology, Institute of Health and Medical Technology, Hefei Institutes of Physical Science, Chinese Academy of Sciences</p> <p>Tao, Xinchun; Anhui Medical University</p> <p>Li, Yamei; Anhui Medical University</p> <p>Wang, Yi; Anhui Medical University</p> <p>Wang, Xin; Anhui Medical University</p> <p>hu, xianwen; The Second Hospital of Anhui Medical University, Department of Anesthesiology; Key Laboratory of Anesthesiology and Perioperative Medicine of Anhui Higher Education Institutes, Anhui Medical University</p> |
| Keywords:                     | Anesthesia                                                                                                                                                                                                                                                                                                                                                                                                                                                                                                                                                                                                                                                                                                                                                                                                                                                                                                                                                                                                                                                                      |
|                               |                                                                                                                                                                                                                                                                                                                                                                                                                                                                                                                                                                                                                                                                                                                                                                                                                                                                                                                                                                                                                                                                                 |

SCHOLARONE™  
Manuscripts

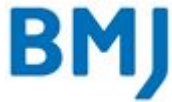

I, the Submitting Author has the right to grant and does grant on behalf of all authors of the Work (as defined in the below author licence), an exclusive licence and/or a non-exclusive licence for contributions from authors who are: i) UK Crown employees; ii) where BMJ has agreed a CC-BY licence shall apply, and/or iii) in accordance with the terms applicable for US Federal Government officers or employees acting as part of their official duties; on a worldwide, perpetual, irrevocable, royalty-free basis to BMJ Publishing Group Ltd ("BMJ") its licensees and where the relevant Journal is co-owned by BMJ to the co-owners of the Journal, to publish the Work in this journal and any other BMJ products and to exploit all rights, as set out in our [licence](#).

The Submitting Author accepts and understands that any supply made under these terms is made by BMJ to the Submitting Author unless you are acting as an employee on behalf of your employer or a postgraduate student of an affiliated institution which is paying any applicable article publishing charge ("APC") for Open Access articles. Where the Submitting Author wishes to make the Work available on an Open Access basis (and intends to pay the relevant APC), the terms of reuse of such Open Access shall be governed by a Creative Commons licence – details of these licences and which [Creative Commons](#) licence will apply to this Work are set out in our licence referred to above.

Other than as permitted in any relevant BMJ Author's Self Archiving Policies, I confirm this Work has not been accepted for publication elsewhere, is not being considered for publication elsewhere and does not duplicate material already published. I confirm all authors consent to publication of this Work and authorise the granting of this licence.

**Title page****Individual Cartoon Video for Alleviating Perioperative Anxiety and Reducing Emergence Delirium in Children: A Prospective Randomized Trial****Authors**

Xinyu Tang<sup>1,2</sup>, Muchun Zhang<sup>1,2</sup>, Lizhuang Yang<sup>3</sup>, Xinchun Tao<sup>4</sup>, Yamei Li<sup>4</sup>, Yi Wang<sup>4</sup>, Xin Wang<sup>4</sup>,  
Xianwen Hu<sup>1,2</sup>,

1.Department of Anesthesiology, The Second Hospital of Anhui Medical University, Hefei 230601, China

2.Key Laboratory of Anesthesiology and Perioperative Medicine of Anhui Higher Education Institutes,  
Anhui Medical University, Anhui 230601, China

3.Anhui Province Key Laboratory of Medical Physics and Technology, Institute of Health and Medical  
Technology, Hefei Institutes of Physical Science, Chinese Academy of Sciences. Anhui 230088, China

4. Anhui Medical University, Hefei 230000, China

Xinyu Tang

E-mail: [xinyutang325@foxmail.com](mailto:xinyutang325@foxmail.com)

Muchun Zhang

E-mail: [835367969@qq.com](mailto:835367969@qq.com)

Lizhuang Yang

E-mail: [lzyang@ustc.edu.cn](mailto:lzyang@ustc.edu.cn)

Xinchun Tao

E-mail: [taoxinchun2023@163.com](mailto:taoxinchun2023@163.com)

Yamei Li

E-mail: [lym\\_0106@163.com](mailto:lym_0106@163.com)

Yi Wang

E-mail: [13625635360@163.com](mailto:13625635360@163.com)

Xin Wang

E-mail: [13866656039@163.com](mailto:13866656039@163.com)

Xianwen Hu

E-mail: [huxianwen001@163.com](mailto:huxianwen001@163.com)

**Correspondence**

Xianwen Hu, Department of Anesthesiology, The Second Hospital of Anhui Medical University, Hefei 230601, China.

1  
2  
3  
4  
5  
6  
7  
8  
9  
10  
11  
12  
13  
14  
15  
16  
17  
18  
19  
20  
21  
22  
23  
24  
25  
26  
27  
28  
29  
30  
31  
32  
33  
34  
35  
36  
37  
38  
39  
40  
41  
42  
43  
44  
45  
46  
47  
48  
49  
50  
51  
52  
53  
54  
55  
56  
57  
58  
59  
60

E-mail address: [huxianwen001@163.com](mailto:huxianwen001@163.com) (X. Hu).

Xinyu Tang and Muchun Zhang contributed equally to this paper.

Confidential: For Review Only

## Abstract

**BACKGROUND:** Perioperative anxiety and emergence delirium may cause a series of adverse events, which are worth investigating. Pharmacological treatments remain uncertain, while nonpharmacological treatments lack personalization and pertinence.

**AIMS:** The aim of this study was to determine whether an individual cartoon video is capable of alleviating perioperative anxiety and reducing emergence delirium in preschool children.

**METHODS:** Children between 3 and 7 years old undergoing adenoidectomy and tonsillectomy were randomly assigned to an individual cartoon video group (group V) or a control group (group C). In group V, an individual cartoon video was played throughout the whole waiting, anesthesia induction and anesthesia recovery periods. The children in group C were contacted through verbal conversation. The primary outcomes were perioperative pediatric anxiety measured by the Modified Yale Preoperative Anxiety Scale (mYPAS) and emergence delirium assessed by the Pediatric Anesthesia Emergence Delirium (PAED) scale. The secondary outcomes included cooperation during induction, postoperative pain and adverse events.

**RESULTS:** The mYPAS scores were comparable in the two groups ( $P = 0.583$ ) at the holding area (T0), but the mYPAS scores of group V were significantly lower than those of group C at the time of entering the operating room (T1), during the induction of anesthesia (T2) and leaving the PACU (T6) ( $P < 0.001$ ,  $P < 0.001$ ,  $P = 0.001$ ) after intervention. The incidence of emergence delirium ( $PAED \geq 10$ ) in group V was significantly lower than that in group C after extubation (T3) and upon arrival at the PACU (T4) (55% vs. 77.5%,  $P = 0.033$ ; 32.5% vs. 55%,  $P = 0.043$ ). We found no differences in cooperation during induction, postoperative pain or the incidence of adverse events between the groups.

**CONCLUSIONS:** The individual cartoon video is an effective method of alleviating perioperative anxiety and reducing the incidence of emergence delirium in children.

### Ethics Approval Statement

This clinical trial was approved by the Ethics Committee of the Second Hospital of Anhui Medical University (Reference number: YX2022-084 (F1))

### Clinical Trial Registration Identifier

ChiCTR2200062300 (<https://www.chictr.org.cn/index.aspx>)

**KEY WORDS :** individual cartoon video ; anxiety ; emergence delirium ; pediatrics;

### What is already known about the topic?

Anxiety and emergence delirium are commonly observed in young children and cause many adverse effects.

1  
2  
3 Pharmacological treatments of anxiety and emergence delirium remain uncertain, while  
4 nonpharmacological treatments lack personalization and pertinence.  
5  
6

### 7 **What new information this study adds?**

8 The patients' favorite cartoon video was played as the intervention for anxiety, which will be targeted, and  
9 the effect will be maximized.

10 The individual cartoon video can not only alleviate perioperative anxiety, but reduce the incidence of  
11 emergence delirium in children.  
12  
13

### 14 **How this study might affect the practice?**

15 The patients' favorite cartoon video can be played as the intervention for anxiety and emergence delirium,  
16 which will be targeted, easy-accessed and the effect will be maximized.  
17  
18  
19

### 20 **Introduction**

21 Emergence delirium (ED) is described as a complex of perceptual disturbances and psychomotor agitation  
22 in young children in the early postanesthetic period following a sevoflurane-based anesthetic<sup>[1]</sup>. Delirium  
23 may arise upon emergence from anesthesia, with a variable incidence of 10–80%<sup>[2-4]</sup>. ED can exert a negative  
24 impact on patient safety because there can be injury to the surgical site, tearing of drains or dressings, or  
25 accidental removal of intravenous catheters, which can even prolong the hospital length of stay. Therefore,  
26 reducing ED is a worthy clinical issue in pediatric anesthesia. Anxiety is a common abnormal psychological  
27 state before pediatric anesthesia and surgery. Due to their immature physical and mental development,  
28 children are often in a state of psychological stress during the perioperative period, which is defined as  
29 anxiety. It has been reported that up to 65% of children in the holding area and during the induction of  
30 anesthesia experience intense anxiety about anesthesia and surgery<sup>[5]</sup>. Severe anxiety easily causes  
31 noncompliance during anesthesia induction, severe pain and even delirium during the recovery period.  
32 Therefore, alleviating anxiety and reducing the incidence of ED in children are of great significance for  
33 ensuring perioperative safety and improving surgical prognosis.  
34  
35  
36  
37  
38  
39

40 The current clinical measures to prevent ED in children include pharmacological and nonpharmacological  
41 preventions. The preventive and therapeutic drugs commonly used are propofol, opioids, ketamine,  $\alpha_2$   
42 receptor agonists and benzodiazepines<sup>[6]</sup>. However, the efficacy of these drugs is not clear, and the optimal  
43 dosage is unknown. In addition, due to the immaturity of children's physical and psychological development,  
44 pharmacological treatment has side effects and potential risks, and the compliance of young children in  
45 taking medication is low. Compared with it, nonpharmacological interventions are more comfortable, safer  
46 and free of drug side effects. Nonpharmacological measures include age-appropriate preoperative education,  
47 family-centered preoperative preparation, parental company during anesthesia induction and distraction of  
48 children. Although parents' company and family-centered preoperative preparation can alleviate children's  
49 preoperative anxiety to a certain extent<sup>[7]</sup>, children cannot be accompanied by their parents after entering the  
50 surgical isolation area due to the aseptic requirements. As a result, pediatric patients are often nervous and  
51 anxious, and it is hard for them to cooperate with medical staff. Preschool children usually enjoy watching  
52 cartoons. Although previous studies have suggested that cartoon videos can be a good distraction for children  
53 and may improve their preoperative anxiety and compliance with medical procedures<sup>[8, 9]</sup>, the cartoon videos  
54 used in previous studies lack personalization and pertinence. The preferred cartoon videos in each age group  
55 and even in children one year apart are different. Therefore, it is difficult to ensure the same level of attraction  
56  
57  
58  
59  
60

1  
2  
3 for the children when using impersonalized cartoon videos. Meanwhile, most previous studies have  
4 suggested that the causes of emergence and postoperative delirium are related to preoperative anxiety and  
5 that reducing preoperative anxiety can reduce the incidence of postoperative delirium. Therefore, some  
6 studies have focused only on how to reduce preoperative anxiety, while few have continued to pay attention  
7 to the anxiety of children who are awakening in the PACU<sup>[1]</sup>.  
8  
9

10  
11 Therefore, this study was performed to determine whether individual cartoon videos are capable of  
12 alleviating perioperative anxiety and reducing emergence delirium in preschool children.  
13  
14

### 15 **Methods**

16 This clinical trial was approved by the Ethics Committee of the Second Hospital of Anhui Medical  
17 University (Reference number: YX2022-084 (F1)) and was registered at the Chinese Clinical Trial Registry  
18 (Reference number: ChiCTR2200062300). Written consent was obtained from parents (or guardians). This  
19 single-center, randomized clinical trial was conducted from August to September 2022 in accordance with  
20 the principles of the Helsinki Declaration.  
21  
22

23  
24 Ninety-five patients aged between 3 and 7 years with an American Society of Anesthesiologists physical  
25 status I-II and who were scheduled for their first elective adenoidectomy or adenotonsillectomy under  
26 general anesthesia were enrolled. Children having emergency surgery and those with previous anesthetic  
27 experience, developmental delays, mental retardation, sedative medication or chronic illnesses were  
28 excluded from the study.  
29  
30

31  
32 The day before surgery, the eligible patients were visited by a trained anesthesiologist, and their general  
33 information and favorite cartoon videos were recorded. On the day of surgery, all of the patients were brought  
34 to the holding area 30 min before surgery and treated according to the group assignment. The enrolled  
35 children were randomized into two groups using a computer-generated randomization program: group V  
36 (distraction by watching an individual cartoon video) and group C (control). The patients in group V began  
37 to watch a favorite cartoon video on iPad throughout the whole waiting and anesthesia induction process.  
38 Patients in group C were contacted by the medical staff through verbal conversation to relieve their anxiety.  
39  
40

41  
42 The surgery and anesthesia were always performed by the same professionals (two surgeons and an  
43 anesthesiologist), and standard anesthetic regimens and techniques were used for all patients. After the  
44 application of standard monitoring, including blood pressure, electrocardiography and  
45 blood oxygen saturation, inhalation anesthesia induction was performed at tidal volume, with incrementing  
46 sevoflurane up to 8% with a 50% mixture of air and oxygen (6 L/min). Peripheral IV access was obtained,  
47 and an appropriately sized laryngeal tube was inserted after a suitable anesthetic depth was obtained by the  
48 injection of propofol (2 mg/kg), sufentanil (0.2 µg/kg) and cisatracurium (0.1 mg/kg). Then, atropine (0.02  
49 mg/kg) and dexamethasone (0.1 mg/kg) were administered, and anesthesia was maintained with remifentanyl  
50 0.2-0.3 µg/kg/min and sevoflurane 3%-5%. At the end of surgery, the children were extubated after  
51 awakening with adequate spontaneous ventilation and were transferred to the postanesthetic care unit (PACU)  
52 for observation. In group V, the individual cartoon video was continuously played in the early recovery stage  
53 until the children left the PACU and were reunited with their parents.  
54  
55

56  
57 The primary outcomes were anxiety measured by the Modified Yale Preoperative Anxiety Scale (mYPAS)  
58  
59  
60



1  
2  
3 and ED assessed by the Pediatric Anesthesia Emergence Delirium (PAED) scale. The mYPAS is a validated  
4 perioperative pediatric anxiety instrument with observational measurements of anxiety in 5 categories  
5 (activity, emotional expressivity, state of arousal, vocalization, and use of parents)<sup>[10]</sup>. Scores range from  
6 23.33 to 100, with higher scores indicating higher levels of anxiety<sup>[11]</sup>. The mYPAS was administered at 4  
7 time points: in the preoperative holding area (baseline, or T0), upon entering the operating room (T1), during  
8 the induction of anesthesia (T2) and upon leaving the PACU (T6). Behavior on emergence was measured  
9 using the PAED scale. The PAED scale was assessed at 4 time points: immediately after extubation (T3), on  
10 arriving in the PACU (T4), 30 min after arriving in the PACU (T5) and T6. ED was defined as PAED scores  
11  $\geq 10$ . The PAED scale was also used to measure the intensity of ED, where 0 represents no ED and 20 is the  
12 maximum intensity of ED. The induction compliance checklist (ICC) was used to assess the cooperation of  
13 the children at T2. A validated simplified 3-point scoring system for ICC [perfect (ICC = 0), moderate (ICC  
14 = 1–3), and poor (ICC  $\geq 4$ )] was used in our trial<sup>[12]</sup>. The FLACC assessment tool was also administered to  
15 measure postoperative pain at the same time as PAED. The FLACC scale scores the pain intensity by rating  
16 five behaviors (face, legs, activity, consolability and cry) to derive a score out of 10.<sup>[13]</sup> All assessments were  
17 completed by the same trained anesthesiologist who is blinded to the group allocation. For the patients  
18 suffering from ED, the first measure was to comfort the patients with words. When this failed, the patients  
19 were treated with propofol (10–20 mg IV). If a child exhibited signs of pain with a FLACC scale  $> 4$ ,  
20 sufentanil (0.05  $\mu\text{g}/\text{kg}$  IV) was administered as rescue medication.  
21  
22  
23  
24  
25  
26  
27  
28

29 For the sample size calculation, we used a proportion of ED and anxiety of 50%, as reported in previously  
30 published studies<sup>[3, 5]</sup>. Therefore, 40 subjects per group would have a significance level of 5% and a power  
31 of 80% in detecting a 30% reduction in ED incidence between the groups. While anticipating a 15% dropout  
32 rate, we estimated that 46 patients were needed in each group.  
33  
34  
35

36 SPSS 26.0 statistical software was used to statistically process and analyze the data. The measurement data  
37 conforming to the normal distribution were expressed as the mean  $\pm$  standard deviation, and the comparison  
38 between the groups was performed by two independent samples t test. Enumeration data were expressed by  
39 the number of patients (percentage) [n(%)], and the comparison was made by  $\chi^2$  test. The comparison of  
40 measurement data that did not conform to a normal distribution was expressed by a nonparametric test and  
41 is shown as the median (25th percentile, 75th percentile). Taking  $\alpha=0.05$  as the test level,  $P<0.05$  indicates  
42 a statistically significant difference.  
43  
44  
45

## 46 Results

47 As shown in the Consort flow chart (Figure 1), 95 children were enrolled in our study, and 15 children were  
48 excluded because of withdrawal of consent, loss of follow-up, discontinued intervention or extra medication.  
49 Thus, 80 participants completed the study and were included in the final data analysis. There were no  
50 statistically significant differences between the groups in terms of age, gender, height, weight, duration of  
51 surgery and anesthesia or the type of surgery (Table 1).  
52  
53  
54

55 Compared with the baseline, the mYPAS score of group V was found to be significantly changed at T1  
56 ( $P<0.001$ ). In group C, the increase in mYPAS scores showed statistically significant differences at T1, T2  
57 and T6 ( $P=0.002$ ,  $P<0.001$  and  $P<0.001$ ) (Figure 2). The mYPAS scores at T0 exhibiting baseline anxiety  
58 were not statistically different between the groups ( $P = 0.583$ ) before the intervention. After the intervention,  
59  
60

1  
2  
3 the mYPAS scores were different between the groups at T1 ( $P < 0.001$ ), T2 ( $P < 0.001$ ) and T6 ( $P=0.001$ ).  
4 Meanwhile, both the peak mYPAS scores and the incidence of anxiety (mYPAS score $>40$ ) showed  
5 significant differences between the two groups ( $P<0.001$ ;  $P=0.013$ ) (Table 2). The individual cartoon video  
6 not only reduced the level of anxiety but also shortened the duration of anxiety.  
7  
8  
9

10 The incidence of ED (PAED $\geq 10$ ) in group V was significantly lower than that in group C at T3 and T4 (55%  
11 vs. 77.5%,  $P=0.033$ ; 32.5% vs. 55%,  $P=0.043$ ). The peak of PAED in group C was significantly higher than  
12 that in group V. Additionally, the overall incidence of severe ED (PAED $\geq 15$ ) showed a significant difference  
13 between group C and group V (15% vs. 35%,  $P=0.039$ ), while the incidence of ED showed no significant  
14 difference (60% vs. 80%,  $P=0.051$ ) (Table 3). The individual cartoon video may reduce the severity of ED  
15 and the overall incidence of severe ED.  
16  
17  
18  
19  
20

21 The FLACC scores were not different between the two groups at T3, T4, T5 and T6. Similarly, the ICC and  
22 the incidence of adverse events were not found to be different (Table 4).  
23  
24

## 25 Discussion

26 In the present study, we found that individual cartoon videos can significantly alleviate perioperative anxiety  
27 and reduce the incidence of ED in pediatric patients undergoing adenoidectomy and adenotonsillectomy.  
28  
29

30 Up to 65% of all children undergoing anesthesia and surgery develop intense anxiety and fear in the  
31 preoperative holding area and during the induction of anesthesia. This anxiety can be attributed to parental  
32 separation and uncertainty about the procedure. Many studies<sup>[14]</sup> have confirmed that preoperative anxiety  
33 in young children undergoing surgery is associated with a more painful postoperative recovery and a higher  
34 incidence of sleep and other problems. A number of pharmacological and nonpharmacological measures are  
35 frequently used to prevent or alleviate anxiety in pediatrics. Although pharmacologic intervention with a  
36 sedative (i.e., midazolam) to alleviate children's anxiety is regarded as an effective method, it has been  
37 associated with delays in hospital discharge and maladaptive behavioral changes. Additionally, the difficulty  
38 in administering premedication to children due to their reluctance or refusal is still a problem that cannot be  
39 ignored. Manyande A<sup>[15]</sup> showed that the presence of parents during induction of general anesthesia does not  
40 diminish their child's anxiety and that playing videos of the child's choice during induction is a potentially  
41 promising nonpharmacological intervention.  
42  
43  
44  
45  
46

47 Most preschool children are very fond of watching cartoon videos. Gamze Inan<sup>[7]</sup> demonstrated 3 different  
48 distraction techniques on the pain and anxiety levels of children during venipuncture, in which there are only  
49 several popular fixed options, whether in cartoon movies or video games. Jeongwoo Lee<sup>[16]</sup> similarly  
50 preselected 10 movies, including 4 action movies, 4 comics, 1 science fiction and Cinderella, in his study  
51 about the effect of cartoon distraction on pediatric surgical patients. In our study, we did not limit the number  
52 and types of cartoon videos. We determined the patients' favorite cartoon video one day before the operation  
53 and downloaded it in advance. A favorite cartoon can immerse children in videos and distract their attention  
54 from the unfamiliar environment and the absence of their parents. Meanwhile, many popular cartoons are  
55 freely available with public access. Therefore, the intervention of watching individual cartoons to reduce  
56 anxiety can be used without increasing health care costs. In this way, the intervention for anxiety will be  
57  
58  
59  
60

1  
2  
3 targeted, and the effect will be maximized.  
4  
5

6 Katherine A<sup>[17]</sup> showed that the children in the group with video distraction displayed significantly less  
7 anxiety at anesthetic induction and had a smaller increase in anxiety from the holding area to induction than  
8 those in the standard care group. Patel<sup>[18]</sup> et al. also demonstrated that animated cartoon distraction produced  
9 a significant reduction in anxiety in children aged 4 to 12 years compared with the intervention of oral  
10 premedication or parental presence. These findings are consistent with our findings. We noticed that many  
11 studies focused only on preoperative anxiety and ignored the postoperative status of the patient's anxiety.  
12 After surgery, pediatric patients often cry and scream because they long for their parents' company, which  
13 is also seen as a form of anxiety. In our study, we found that the pediatric patients in the group without  
14 cartoon video distraction displayed more anxiety when they departed from the PACU than the patients in the  
15 cartoon video group. As a result, the individual cartoon videos play a key role in alleviating anxiety in the  
16 whole perioperative period.  
17  
18  
19  
20

21 Kain<sup>[19]</sup> pointed out an important correlation between emergence delirium and preoperative anxiety in  
22 children: for every 10-point increase in the mYPAS, the risk of delirium increases by 10%. A previous  
23 study<sup>[20]</sup> suggested that preoperative anxiety was one of the risk factors for ED. Thus, interventions aimed  
24 at alleviating preoperative anxiety are of great significance for preventing ED. In this study, the individual  
25 cartoon video is an easy and effective modality to alleviate anxiety and prevent ED. The outcome of this  
26 study showed that the overall incidence of ED in the individual cartoon video group was 20% lower than  
27 that in the control group. Specifically, the incidence of ED in the two groups showed a large difference at  
28 the time of extracting the tracheal tube and arriving at the PACU. However, the differences between the two  
29 groups at 30 min after arriving in the PACU and departing from the PACU were not statistically significant.  
30 A possible explanation for this might be that during the period when the patient is not fully awake, there is  
31 a high incidence of emergence agitation. Because the patient is not fully conscious, the sound or scene of  
32 their favorite cartoon video makes it easier for them to calm them down.  
33  
34  
35  
36  
37

38 There were no significant differences in the incidence of adverse events between the two groups. However,  
39 previous studies<sup>[21]</sup> have found that ED increases the risk of these adverse events. The possible reason is that  
40 our study may be limited by the sample size. We calculated the sample size with the incidence of ED and  
41 anxiety, and a larger sample size is required for determining differences in adverse events.  
42  
43  
44

#### 45 **Conclusion**

46 We concluded that the individual cartoon video could significantly alleviate perioperative anxiety and reduce  
47 the incidence of emergence delirium in pediatric patients.  
48  
49

#### 50 **Acknowledgements**

51 The authors thank all nurses and anesthetists for their participation in the study.  
52  
53

#### 54 **Funding statement**

55 This work is supported by the Second Affiliated Hospital of Anhui Medical University and Hefei Research  
56 Institute of Chinese Academy of Sciences (202004), Anhui Provincial Health Commission  
57 (AHWJ2021a017), Education Department of Anhui Province (KJ2021ZD0030).  
58  
59  
60

**Assistance with the study**

none.

**Author contributions**

Xinyu Tang and Muchun Zhang contributed equally to this paper.

All authors contributed to the study conception and design. Material preparation and data collection were performed by Xinchun Tao, Yamei Li, Yi Wang and Xin Wang. Data analysis was conducted by Xinyu Tang and Muchun Zhang. The first draft of the manuscript was written by Xinyu Tang and Muchun Zhang and all authors commented on previous versions of the manuscript. All authors read and approved the final manuscript.

**Competing interests statement**

All authors declare that they have no competing interests.

**Ethics Statement**

This clinical trial was approved by the Ethics Committee of the Second Hospital of Anhui Medical University (Reference number: YX2022-084 (F1)) and was registered at the Chinese Clinical Trial Registry (Reference number: ChiCTR2200062300). The study was performed in accordance with the Helsinki Declaration of 1964, and its later amendments. Written consent was obtained from parents (or guardians).

**Data availability statement**

The data to support the results of this study is available from the corresponding author on reasonable request.

**Prior presentation**

none

**References**

- [1] BANCHS R J, LERMAN J. Preoperative anxiety management, emergence delirium, and postoperative behavior [J]. *Anesthesiol Clin*, 2014, 32(1): 1-23.
- [2] VAN HOFF S L, O'NEILL E S, COHEN L C, et al. Does a prophylactic dose of propofol reduce emergence agitation in children receiving anesthesia? A systematic review and meta-analysis [J]. *Paediatr Anaesth*, 2015, 25(7): 668-76.
- [3] CHANDLER J R, MYERS D, MEHTA D, et al. Emergence delirium in children: a randomized trial to compare total intravenous anesthesia with propofol and remifentanyl to inhalational sevoflurane anesthesia [J]. *Paediatr Anaesth*, 2013, 23(4): 309-15.

- 1  
2  
3  
4 [4] KANAYA A, KURATANI N, SATOH D, et al. Lower incidence of emergence agitation in children  
5  
6 after propofol anesthesia compared with sevoflurane: a meta-analysis of randomized controlled  
7  
8 trials [J]. *J Anesth*, 2014, 28(1): 4-11.  
9  
10  
11 [5] KAIN Z N, MAYES L C, O'CONNOR T Z, et al. Preoperative anxiety in children. Predictors and  
12  
13 outcomes [J]. *Arch Pediatr Adolesc Med*, 1996, 150(12): 1238-45.  
14  
15 [6] MASON K P. Paediatric emergence delirium: a comprehensive review and interpretation of the  
16  
17 literature [J]. *Br J Anaesth*, 2017, 118(3): 335-43.  
18  
19  
20 [7] INAN G, INAL S. The Impact of 3 Different Distraction Techniques on the Pain and Anxiety  
21  
22 Levels of Children During Venipuncture: A Clinical Trial [J]. *Clin J Pain*, 2019, 35(2): 140-7.  
23  
24  
25 [8] DíEZ-ÁLVAREZ E, ARROSPIDE A, MAR J, et al. [Effectiveness of pre-operative education in  
26  
27 reducing anxiety in surgical patients] [J]. *Enferm Clin*, 2012, 22(1): 18-26.  
28  
29  
30 [9] KERIMOGLU B, NEUMAN A, PAUL J, et al. Anesthesia induction using video glasses as a  
31  
32 distraction tool for the management of preoperative anxiety in children [J]. *Anesth Analg*, 2013,  
33  
34 117(6): 1373-9.  
35  
36  
37 [10] JENKINS B N, FORTIER M A, KAPLAN S H, et al. Development of a short version of the  
38  
39 modified Yale Preoperative Anxiety Scale [J]. *Anesth Analg*, 2014, 119(3): 643-50.  
40  
41  
42 [11] KAIN Z N, MAYES L C, CICCHETTI D V, et al. The Yale Preoperative Anxiety Scale: how does  
43  
44 it compare with a "gold standard"? [J]. *Anesth Analg*, 1997, 85(4): 783-8.  
45  
46  
47 [12] KAIN Z N, MAYES L C, WANG S M, et al. Parental presence during induction of anesthesia  
48  
49 versus sedative premedication: which intervention is more effective? [J]. *Anesthesiology*, 1998,  
50  
51 89(5): 1147-56; discussion 9A-10A.  
52  
53  
54 [13] CRELLIN D J, HARRISON D, SANTAMARIA N, et al. The Psychometric Properties of the  
55  
56  
57  
58  
59  
60

- 1  
2  
3  
4 FLACC Scale Used to Assess Procedural Pain [J]. *J Pain*, 2018, 19(8): 862-72.  
5  
6  
7 [14] KAIN Z N, MAYES L C, CALDWELL-ANDREWS A A, et al. Preoperative anxiety, postoperative  
8  
9 pain, and behavioral recovery in young children undergoing surgery [J]. *Pediatrics*, 2006, 118(2):  
10  
11 651-8.  
12  
13  
14 [15] <non pharmacological interventions fo source cochrane database syst rev so 2015 jul 14 7  
15  
16 cd006447.pdf> [J].  
17  
18  
19 [16] LEE J, LEE J, LIM H, et al. Cartoon distraction alleviates anxiety in children during induction of  
20  
21 anesthesia [J]. *Anesth Analg*, 2012, 115(5): 1168-73.  
22  
23  
24 [17] MIFFLIN K A, HACKMANN T, CHORNEY J M. Streamed video clips to reduce anxiety in  
25  
26 children during inhaled induction of anesthesia [J]. *Anesth Analg*, 2012, 115(5): 1162-7.  
27  
28  
29 [18] PATEL A, SCHIEBLE T, DAVIDSON M, et al. Distraction with a hand-held video game reduces  
30  
31 pediatric preoperative anxiety [J]. *Paediatr Anaesth*, 2006, 16(10): 1019-27.  
32  
33  
34 [19] KAIN Z N, CALDWELL-ANDREWS A A, MARANETS I, et al. Preoperative anxiety and  
35  
36 emergence delirium and postoperative maladaptive behaviors [J]. *Anesth Analg*, 2004, 99(6):  
37  
38 1648-54.  
39  
40  
41  
42 [20] KIM J, KIM S Y, LEE J H, et al. Low-Dose Dexmedetomidine Reduces Emergence Agitation  
43  
44 after Desflurane Anaesthesia in Children Undergoing Strabismus Surgery [J]. *Yonsei Med J*,  
45  
46 2014, 55(2): 508-16.  
47  
48  
49  
50 [21] MALARBI S, STARGATT R, HOWARD K, et al. Characterizing the behavior of children  
51  
52 emerging with delirium from general anesthesia [J]. *Pediatric Anesthesia*, 2011, 21(9): 942-50.  
53  
54  
55  
56  
57  
58  
59  
60

**Table 1.** Demographic and surgical characteristics of the patients

|                              | Individual cartoon video<br>(n = 40) | Control (n = 40) | P value |
|------------------------------|--------------------------------------|------------------|---------|
| Age (years)                  | 5.75 ± 1.21                          | 5.68 ± 1.58      | 0.812   |
| Gender (male) [n (%)]        | 17 (42.5)                            | 23 (57.5)        | 0.180   |
| Height (cm)                  | 114.43 ± 9.24                        | 108.10 ± 11.92   | 0.319   |
| Weight (kg)                  | 21.47 ± 6.18                         | 21.63 ± 5.26     | 0.271   |
| Surgery length (min)         | 34.45 ± 12.07                        | 34.63 ± 12.20    | 0.596   |
| Anesthesia length (min)      | 47.35 ± 15.16                        | 46.23 ± 14.09    | 0.691   |
| Surgery [n (%)]              |                                      |                  | 0.875   |
| Adenoidectomy                | 15 (37.5)                            | 17 (42.5)        |         |
| Tonsillectomy                | 10 (25)                              | 10 (25)          |         |
| Adenoidectomy+ Tonsillectomy | 15 (37.5)                            | 13 (32.5)        |         |

Data are presented as frequency (percentage) or mean ± SD (Standard Deviation).

**Table 2.** Perioperative pediatric anxiety between the two groups

|                 | Individual cartoon video (n = 40) | Control (n = 40)    | P value            |
|-----------------|-----------------------------------|---------------------|--------------------|
| mYPAS           |                                   |                     |                    |
| T0              | 44.60 [36.36~50.00]               | 42.09 [33.36~50.00] | 0.583              |
| T1              | 34.32 [32.15~38.89]               | 46.76 [40.04~62.94] | 0.000 <sup>†</sup> |
| T2              | 38.89 [33.33~44.27]               | 59.58 [48.44~80.00] | 0.000 <sup>†</sup> |
| T6              | 39.86 [33.33~59.73]               | 56.93 [45.85~78.81] | 0.001 <sup>†</sup> |
| Peak_mYPAS      | 51.00 [41.67~60.89]               | 64.14 [53.57~85.47] | 0.000 <sup>†</sup> |
| Anxiety [n (%)] | 32 (80)                           | 39 (97.5)           | 0.013 <sup>†</sup> |

Data are presented as frequency (percentage) or median [25th percentile to 75th percentile] as appropriate.

<sup>†</sup>P < 0.05 versus the control group

mYPAS, Modified Yale Preoperative Anxiety Scale

T0, preoperative holding area

T1, entry to the operating room

T2, induction of anesthesia

T6, leaving the PACU

Peak\_mYPAS refers to the highest score of mYPAS in the four time points of T0, T1, T2 and T6.

mYPAS score > 40 is considered as the occurrence of anxiety .



**Table 3.** Emergence delirium between the two groups

|                   | Individual cartoon video (n = 40) | Control (n = 40)    | P value            |
|-------------------|-----------------------------------|---------------------|--------------------|
| PAED              |                                   |                     |                    |
| T3 [n (%)]        | 22 (55)                           | 31 (77.5)           | 0.033 <sup>†</sup> |
| T4 [n (%)]        | 13 (32.5)                         | 22 (55)             | 0.043 <sup>†</sup> |
| T5 [n (%)]        | 9 (22.5)                          | 10 (25)             | 0.793              |
| T6 [n (%)]        | 6 (15)                            | 5 (12.5)            | 0.745              |
| Peak_PAED         | 12.00 [9.00~13.00]                | 13.50 [10.00~15.00] | 0.016 <sup>†</sup> |
| ED [n (%)]        | 24 (60)                           | 32 (80)             | 0.051              |
| Severe ED [n (%)] | 6 (15)                            | 14 (35)             | 0.039 <sup>†</sup> |

Data are presented as frequency (percentage) or median [25th percentile to 75th percentile] as appropriate.

<sup>†</sup>P < 0.05 versus the control group

PAED, the Pediatric Anesthesia Emergence Delirium scale

T3, immediately after extubation

T4, arriving in the PACU

T5, 30 min after arriving in the PACU

T6, leaving the PACU

Peak\_PAED refers to the highest score of PAED in the four time points of T3, T4, T5 and T6.

PAED score  $\geq 10$  is considered as the occurrence of ED.

PAED score  $\geq 15$  is considered as the occurrence of severe ED

1  
2  
3  
4  
5  
6  
7  
8  
9  
10  
11  
12  
13  
14  
15  
16  
17  
18  
19  
20  
21  
22  
23  
24  
25  
26  
27  
28  
29  
30  
31  
32  
33  
34  
35  
36  
37  
38  
39  
40  
41  
42  
43  
44  
45  
46  
47  
48  
49  
50  
51  
52  
53  
54  
55  
56  
57  
58  
59  
60

1  
2 **Table 4.** Secondary outcomes of the patients

|                        | Individual cartoon video (n = 40) | Control (n = 40) | P value |
|------------------------|-----------------------------------|------------------|---------|
| FLACC                  |                                   |                  |         |
| T3                     | 3.00 [1.25~4.75]                  | 3.50 [2.00~5.00] | 0.599   |
| T4                     | 3.00 [1.00~5.00]                  | 3.50 [2.00~5.75] | 0.061   |
| T5                     | 2.50 [1.00~4.00]                  | 3.00 [2.00~5.00] | 0.058   |
| T6                     | 2.00 [1.00~3.75]                  | 3.00 [1.00~4.00] | 0.300   |
| ICC                    | 2.00 [0.00~4.00]                  | 3.00 [1.25~4.00] | 0.110   |
| Adverse events [n (%)] | 3 (7.5)                           | 4 (10)           | 0.692   |

3 Data are presented as frequency (percentage) or median [25th percentile to 75th percentile] as  
4 appropriate.

5 FLACC, Face, Legs, Activity, Consolability, Cry scale

6 T3, immediately after extubation

7 T4, arriving in the PACU

8 T5, 30 min after arriving in the PACU

9 T6, leaving the PACU

10 ICC, induction compliance checklist

11 Adverse events refer to severe hypoxemia, bronchospasm, postoperative bleeding, etc.

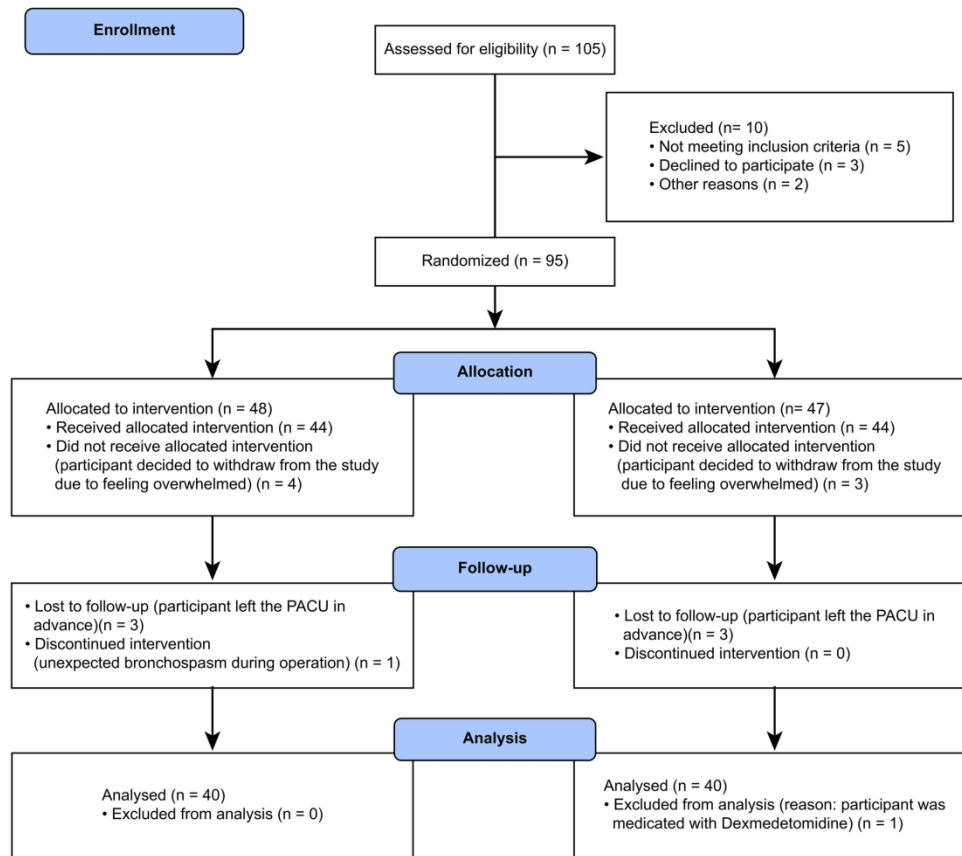

CONSORT flow diagram of the study.

179x157mm (300 x 300 DPI)

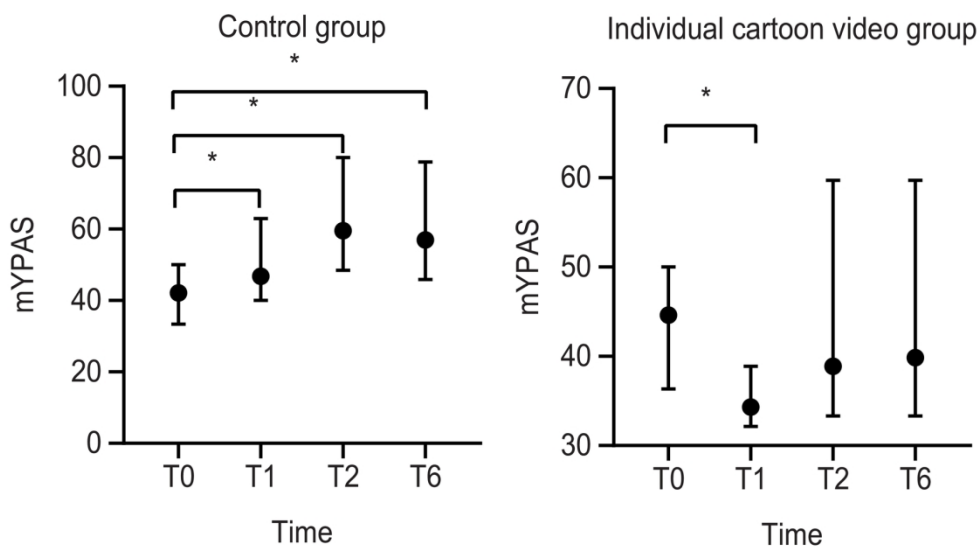

mYPAS score differences at T1, T2 and T6 compared with T0 in control group and individual cartoon group.

\*P < 0.01 versus T0

mYPAS, Modified Yale Preoperative Anxiety Scale

T0, preoperative holding area

T1, entry to the operating room

T2, induction of anesthesia

T6, leaving the PACU

79x46mm (600 x 600 DPI)

# BMJ Paediatrics Open

## Individual Cartoon Video for Alleviating Perioperative Anxiety and Reducing Emergence Delirium in Children: A Prospective Randomized Trial

|                               |                                                                                                                                                                                                                                                                                                                                                                                                                                                                                                                                                                                                                                                                                                                                                                                                                                                                                                                                                                                                                                                                                 |
|-------------------------------|---------------------------------------------------------------------------------------------------------------------------------------------------------------------------------------------------------------------------------------------------------------------------------------------------------------------------------------------------------------------------------------------------------------------------------------------------------------------------------------------------------------------------------------------------------------------------------------------------------------------------------------------------------------------------------------------------------------------------------------------------------------------------------------------------------------------------------------------------------------------------------------------------------------------------------------------------------------------------------------------------------------------------------------------------------------------------------|
| Journal:                      | <i>BMJ Paediatrics Open</i>                                                                                                                                                                                                                                                                                                                                                                                                                                                                                                                                                                                                                                                                                                                                                                                                                                                                                                                                                                                                                                                     |
| Manuscript ID                 | bmjpo-2023-001854.R1                                                                                                                                                                                                                                                                                                                                                                                                                                                                                                                                                                                                                                                                                                                                                                                                                                                                                                                                                                                                                                                            |
| Article Type:                 | Original research                                                                                                                                                                                                                                                                                                                                                                                                                                                                                                                                                                                                                                                                                                                                                                                                                                                                                                                                                                                                                                                               |
| Date Submitted by the Author: | 02-Apr-2023                                                                                                                                                                                                                                                                                                                                                                                                                                                                                                                                                                                                                                                                                                                                                                                                                                                                                                                                                                                                                                                                     |
| Complete List of Authors:     | <p>Tang, Xinyu; The Second Hospital of Anhui Medical University, Department of Anesthesiology; Key Laboratory of Anesthesiology and Perioperative Medicine of Anhui Higher Education Institutes, Anhui Medical University</p> <p>Zhang, Muchun; The Second Hospital of Anhui Medical University, Department of Anesthesiology; Key Laboratory of Anesthesiology and Perioperative Medicine of Anhui Higher Education Institutes, Anhui Medical University</p> <p>Yang, Lizhuang; Anhui Province Key Laboratory of Medical Physics and Technology, Institute of Health and Medical Technology, Hefei Institutes of Physical Science, Chinese Academy of Sciences</p> <p>Tao, Xinchun; Anhui Medical University</p> <p>Li, Yamei; Anhui Medical University</p> <p>Wang, Yi; Anhui Medical University</p> <p>Wang, Xin; Anhui Medical University</p> <p>Hu, Xianwen; The Second Hospital of Anhui Medical University, Department of Anesthesiology; Key Laboratory of Anesthesiology and Perioperative Medicine of Anhui Higher Education Institutes, Anhui Medical University</p> |
| Keywords:                     | Anesthesia, Adolescent Health                                                                                                                                                                                                                                                                                                                                                                                                                                                                                                                                                                                                                                                                                                                                                                                                                                                                                                                                                                                                                                                   |
|                               |                                                                                                                                                                                                                                                                                                                                                                                                                                                                                                                                                                                                                                                                                                                                                                                                                                                                                                                                                                                                                                                                                 |

SCHOLARONE™  
Manuscripts

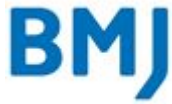

I, the Submitting Author has the right to grant and does grant on behalf of all authors of the Work (as defined in the below author licence), an exclusive licence and/or a non-exclusive licence for contributions from authors who are: i) UK Crown employees; ii) where BMJ has agreed a CC-BY licence shall apply, and/or iii) in accordance with the terms applicable for US Federal Government officers or employees acting as part of their official duties; on a worldwide, perpetual, irrevocable, royalty-free basis to BMJ Publishing Group Ltd ("BMJ") its licensees and where the relevant Journal is co-owned by BMJ to the co-owners of the Journal, to publish the Work in this journal and any other BMJ products and to exploit all rights, as set out in our [licence](#).

The Submitting Author accepts and understands that any supply made under these terms is made by BMJ to the Submitting Author unless you are acting as an employee on behalf of your employer or a postgraduate student of an affiliated institution which is paying any applicable article publishing charge ("APC") for Open Access articles. Where the Submitting Author wishes to make the Work available on an Open Access basis (and intends to pay the relevant APC), the terms of reuse of such Open Access shall be governed by a Creative Commons licence – details of these licences and which [Creative Commons](#) licence will apply to this Work are set out in our licence referred to above.

Other than as permitted in any relevant BMJ Author's Self Archiving Policies, I confirm this Work has not been accepted for publication elsewhere, is not being considered for publication elsewhere and does not duplicate material already published. I confirm all authors consent to publication of this Work and authorise the granting of this licence.

1  
2  
3  
4 **Title page**  
5

6 **Individual Cartoon Video for Alleviating Perioperative Anxiety and Reducing Emergence**  
7 **Delirium in Children: A Prospective Randomized Trial**  
8

9 **Authors**

10 Xinyu Tang<sup>1,2</sup>, Muchun Zhang<sup>1,2</sup>, Lizhuang Yang<sup>3</sup>, Xinchun Tao<sup>4</sup>, Yamei Li<sup>4</sup>, Yi Wang<sup>4</sup>, Xin  
11 Wang<sup>4</sup>, Xianwen Hu<sup>1,2</sup>,  
12

13  
14  
15 1. Department of Anesthesiology, The Second Hospital of Anhui Medical University, Hefei  
16 230601, China  
17

18  
19 2. Key Laboratory of Anesthesiology and Perioperative Medicine of Anhui Higher Education  
20 Institutes, Anhui Medical University, Anhui 230601, China  
21

22  
23 3. Anhui Province Key Laboratory of Medical Physics and Technology, Institute of Health and  
24 Medical Technology, Hefei Institutes of Physical Science, Chinese Academy of Sciences. Anhui  
25 230088, China  
26  
27

28 4. Anhui Medical University, Hefei 230000, China

29 Xinyu Tang

30 E-mail: [xinyutang325@foxmail.com](mailto:xinyutang325@foxmail.com)  
31

32 Muchun Zhang

33 E-mail: [835367969@qq.com](mailto:835367969@qq.com)  
34

35 Lizhuang Yang

36 E-mail: [lzyang@ustc.edu.cn](mailto:lzyang@ustc.edu.cn)  
37

38 Xinchun Tao

39 E-mail: [taoxinchen2023@163.com](mailto:taoxinchen2023@163.com)  
40

41 Yamei Li

42 E-mail: [lym\\_0106@163.com](mailto:lym_0106@163.com)  
43

44 Yi Wang

45 E-mail: [13625635360@163.com](mailto:13625635360@163.com)  
46

47 Xin Wang

48 E-mail: [13866656039@163.com](mailto:13866656039@163.com)  
49

50 Xianwen Hu

51 E-mail: [huxianwen001@163.com](mailto:huxianwen001@163.com)  
52  
53  
54  
55  
56  
57  
58  
59  
60

1  
2  
3 **Correspondence**

4 Xianwen Hu, Department of Anesthesiology, The Second Hospital of Anhui Medical University,  
5 Hefei 230601, China.

6  
7 E-mail address: [huxianwen001@163.com](mailto:huxianwen001@163.com) (X. Hu).  
8  
9

10 Xinyu Tang and Muchun Zhang contributed equally to this paper.  
11  
12  
13  
14  
15  
16  
17  
18  
19  
20  
21  
22  
23  
24  
25  
26  
27  
28  
29  
30  
31  
32  
33  
34  
35  
36  
37  
38  
39  
40  
41  
42  
43  
44  
45  
46  
47  
48  
49  
50  
51  
52  
53  
54  
55  
56  
57  
58  
59  
60

Confidential: For Review Only



## Abstract

**BACKGROUND:** Perioperative anxiety and emergence delirium in young children may cause a series of adverse events, which are worth investigating. Pharmacological treatments of anxiety and delirium remain uncertain, while nonpharmacological treatments lack personalization and pertinence.

**AIMS:** The aim of study was to determine whether an individual cartoon video can alleviate perioperative anxiety and reduce emergence delirium in young children undergoing adenoidectomy and tonsillectomy.

**METHODS:** Children between 3 and 7 years old undergoing adenoidectomy and tonsillectomy were randomly assigned to an individual cartoon video group (group V) or a control group (group C). In group V, an individual cartoon video of the child's own choice was played throughout the whole waiting, anesthesia induction and recovery periods. The children in group C were contacted through verbal conversation. The primary outcomes were anxiety measured by the Modified Yale Preoperative Anxiety Scale (mYPAS) and emergence delirium assessed by the Pediatric Anesthesia Emergence Delirium (PAED) scale. The secondary outcomes included cooperation during induction, postoperative pain and adverse events.

**RESULTS:** The incidence of anxiety were comparable in group V and group C at the holding area (T0)(26% vs. 22%,  $P=0.323$ ), but the incidence of anxiety of group V were significantly lower than those of group C at the time of entering the operating room (T1), during the induction of anesthesia (T2) and leaving the PACU (T6) ( $P<0.001$ ,  $P<0.001$ ,  $P<0.001$ ) after intervention. The peak PAED score in group V was significantly lower than that in group C (12.00 [9.00~13.00] vs. 13.50 [10.00~15.00],  $P=0.016$ ). We found no significant differences in cooperation during induction, postoperative pain or the incidence of adverse events between the groups (2.00 [0.00~4.00] vs. 3.00 [1.25~4.00],  $P=0.110$ ;  $F=0.059$ ,  $P_{\text{group}}=0.808$ ; 3 (7.5%) vs. 4 (10),  $P=0.692$ ).

**CONCLUSIONS:** The individual cartoon video is an effective method of reducing perioperative anxiety and alleviating emergence delirium in children.

### Ethics Approval Statement

This clinical trial was approved by the Ethics Committee of the Second Hospital of Anhui Medical University (Reference number: YX2022-084 (F1))

### Clinical Trial Registration Identifier

ChiCTR2200062300 (<https://www.chictr.org.cn/index.aspx>)

**KEY WORDS :** individual cartoon video ; anxiety ; emergence delirium ; pediatrics;

**What is already known about the topic?**

Anxiety and emergence delirium are commonly observed in young children and cause many adverse effects.

Pharmacological treatments of anxiety and emergence delirium remain uncertain, while nonpharmacological treatments lack personalization and pertinence.

**What new information this study adds?**

Using a child's favorite cartoon video can reduce the incidence of perioperative anxiety.

Using a child's favorite cartoon video may alleviate emergence delirium.

**How this study might affect the practice?**

The patients' favorite cartoon video can be played as the intervention for anxiety and emergence delirium, which will be targeted, easy-accessed and the effect will be maximized.

**Introduction**

Emergence delirium (ED) is described as a complex of perceptual disturbances and psychomotor agitation that most commonly observed in young children in the early postanesthetic period following a sevoflurane-based anesthetic<sup>[1]</sup>. While, anxiety is a common abnormal psychological state before pediatric anesthesia and surgery. It has been reported that up to 65% of children in the holding area and during the induction of anesthesia experience intense anxiety about anesthesia and surgery<sup>[2]</sup>. Severe anxiety easily causes uncooperative behavior, severe pain, emergence delirium, and higher doses of sedation or preoperative analgesia<sup>[3-5]</sup>. Therefore, alleviating anxiety and reducing the incidence of ED in children are of great significance for ensuring perioperative safety and improving surgical prognosis.

Tailored treatment for perioperative anxiety of a pediatric patient can use either pharmacological or non-pharmacological methods, often in tandem. The use of anxiolytic premedication in particular is valuable for certain groups<sup>[6]</sup>, but the efficacy of these drugs is not clear, and the optimal dosage is unknown. In addition, due to the immaturity of children's physical and psychological development, pharmacological treatment has side effects and potential risks, and the compliance of young children in taking medication is low. Compared with pharmacological therapy, non-pharmacological interventions are more comfortable, safer and free of drug side effects<sup>[7]</sup>.

As a whole non-pharmacological modalities comprise education approaches, behavioral techniques, parental presence at induction of anesthesia (PPIA), and complementary and alternative medicine (CAM) techniques, with each category including a range of effective strategies for reducing anxiety<sup>[7]</sup>. Research has increasingly focused on exploring the effects of technology devices, especially based on audiovisual interventions<sup>[8]</sup>. These technology devices (eg, smartphones<sup>[9, 10]</sup>, video glasses<sup>[11]</sup>, streaming videoplayers<sup>[12]</sup>, portable computers<sup>[13, 14]</sup>, iPads<sup>[15]</sup>, and video games<sup>[16]</sup>) have been widely used as a vehicle for streaming media content(eg, video games, streaming video clips, apps<sup>[17]</sup>, virtual reality, and cartoons) to reduce perioperative anxiety in children through distraction.

Cohen et al. used cartoons as an effective distraction tool during surgical procedures in children and in another study demonstrated that playing age-appropriate videos before medical procedures was

1  
2  
3 a more effective distractor than was an interactive toy<sup>[18, 19]</sup>. Compared with premedication or  
4 parental presence only, a handheld video game with parental presence was found to be more  
5 effective for reducing anxiety in children aged 4 to 12 years<sup>[16]</sup>. A study also demonstrates that  
6 pediatric patients who used VR were found to have significantly lower anxiety at the time of  
7 induction of anesthesia compared to patients who did not use VR<sup>[20]</sup>. However, we found that the  
8 choices of the videos<sup>[21]</sup>, handheld video games<sup>[16]</sup> or VR<sup>[20]</sup> in previous studies seemed to be  
9 impersonalized and limited. Most studies used the same media content as interventions, regardless  
10 of the gender and age of patients<sup>[20, 22]</sup>. Even if the selection is based on age and gender, it is possible  
11 that the children cannot find his favorite cartoon video in the options of his age due to individual  
12 differences. Meanwhile, it has been proved that the causes of emergence delirium are related to  
13 preoperative anxiety and that reducing preoperative anxiety can reduce the incidence of  
14 postoperative delirium<sup>[1, 23]</sup>. Therefore, some studies have focused only on how to reduce  
15 preoperative anxiety, while few have continued to pay attention to the anxiety of children who are  
16 awakening in the PACU<sup>[1]</sup>.

17  
18  
19  
20  
21  
22  
23 Therefore, this study was performed to determine whether individual cartoon videos are capable of  
24 alleviating perioperative anxiety and reducing emergence delirium in young children undergoing  
25 adenoidectomy and tonsillectomy.

## 26 27 28 **Methods**

### 29 30 31 **Ethics**

32 This clinical trial was approved by the Ethics Committee of the Second Hospital of Anhui Medical  
33 University (Reference number: YX2022-084 (F1)) and was registered at the Chinese Clinical Trial  
34 Registry (Reference number: ChiCTR2200062300). Written consent was obtained from parents (or  
35 guardians). This single-center, randomized clinical trial was conducted from August to September  
36 2022 in accordance with the principles of the Helsinki Declaration.

### 37 38 39 **Participants**

40 Ninety-five patients aged between 3 and 7 years with an American Society of Anesthesiologists  
41 physical status I-II and who were scheduled for their first elective adenoidectomy or tonsillectomy  
42 under general anesthesia were enrolled. Children having emergency surgery and those with previous  
43 anesthetic experience, developmental delays, intellectual disability, sedative medication or chronic  
44 illnesses were excluded from the study.

### 45 46 47 48 **Patient and Public Involvement**

49 Parents or the public were not directly involved in the design, conduct or plans for the  
50 dissemination of our research.

### 51 52 53 **Procedures**

54 The day before surgery, the eligible patients were visited by a trained anesthesiologist, and their  
55 general information was recorded. Most importantly, through conversations with children, their  
56 favorite cartoon videos even specific to favorite clips were all recorded. There were no limits to the  
57 scope of cartoons, which were freely chosen according to children's preferences. On the day of  
58  
59  
60

1  
2  
3 surgery, all of the patients were brought to the holding area 30 min before surgery and treated  
4 according to the group assignment. The enrolled children were randomized into two groups using a  
5 computer-generated randomization program: group V (distraction by watching an individual  
6 cartoon video) and group C (control). The patients in group V began to watch a favorite cartoon  
7 video on iPad throughout the whole waiting and anesthesia induction process. Patients in group C  
8 were contacted by the medical staff through verbal conversation to relieve their anxiety.  
9  
10

11  
12 The surgical interventions and the administration of anesthesia were always performed by the same  
13 professionals (two surgeons and an anesthesiologist), and standard anesthetic regimens and  
14 techniques were used for all patients. After the application of standard monitoring, including blood  
15 pressure, electrocardiography, blood oxygen saturation, and the bispectral index, inhalation  
16 anesthesia induction was performed at tidal volume, with incrementing sevoflurane up to 8% with  
17 a 50% mixture of air and oxygen (6 L/min). At the same time, the induction compliance checklist  
18 (ICC) score was recorded by a trained nurse. Peripheral IV access was obtained, and an  
19 appropriately sized laryngeal tube was inserted after a suitable anesthetic depth was obtained by the  
20 injection of propofol (2 mg/kg), sufentanil (0.2 µg/kg) and cisatracurium (0.1 mg/kg). Then,  
21 atropine (0.02 mg/kg) and dexamethasone (0.1 mg/kg) were administered, and anesthesia was  
22 maintained with remifentanyl 0.2-0.3 µg/kg/min and sevoflurane 3%-5% with a BIS target range of  
23 40-60. At the end of surgery, the children were extubated after awakening with adequate  
24 spontaneous ventilation and were transferred to the postanesthetic care unit (PACU) for observation.  
25 In group V, the individual cartoon video was continuously played in the early recovery stage until  
26 the children left the PACU and were reunited with their parents.  
27  
28  
29  
30  
31

### 32 Measures

33 Every assessment was completed by the same trained anesthesiologist who is blinded to the group  
34 allocation. The primary outcomes were perioperative pediatric anxiety measured by the Modified  
35 Yale Preoperative Anxiety Scale (mYPAS) and ED assessed by the Pediatric Anesthesia Emergence  
36 Delirium (PAED) scale. The mYPAS is a validated perioperative pediatric anxiety instrument with  
37 22 items in 5 categories (activity, emotional expressivity, state of arousal, vocalization, and use of  
38 parents)<sup>[24]</sup>. In terms of activity, this domain measures the child's level of activity or restlessness,  
39 for example, whether the child is fidgeting in their seat or moving around the room. The domain of  
40 emotional expressivity estimates the child's emotional state and expression, for example, the child  
41 is crying, worried or happy. In terms of state of arousal, this domain measures the child's  
42 physiological arousal, such as vigilance, sucking on thumb or panicked whimpering. The domain  
43 of vocalization investigates whether the child is reading, moaning, screaming, etc. And in terms of  
44 use of parents, it measures the child's reliance on their parents for comfort and support. Scores range  
45 from 23.33 to 100, with higher scores indicating higher levels of anxiety<sup>[25]</sup>. The mYPAS was  
46 administered at 4 time points: in the preoperative holding area (baseline, or T0), upon entering the  
47 operating room (T1), during the induction of anesthesia (T2) and upon leaving the PACU (T6).  
48 Behavior on emergence was measured using the pediatric anesthesia emergence delirium (PAED)  
49 scale<sup>[26]</sup>. A specially trained anesthesiologist assessed the PAED scale at 4 time points: immediately  
50 after extubation (T3), on arriving in the PACU (T4), 30 min after arriving in the PACU (T5) and on  
51 leaving the PACU (T6). ED was defined as PAED scores  $\geq 10$ , and PAED scores  $\geq 15$  is considered  
52  
53  
54  
55  
56  
57  
58  
59  
60

1  
2  
3 as the occurrence of severe ED<sup>[26-30]</sup>. The PAED scale was also used to measure the intensity of ED,  
4 where 0 represents no ED and 20 is the maximum intensity of ED. The induction compliance  
5 checklist (ICC) was used to assess the cooperation of the children during the induction of anesthesia  
6 (T2). A validated simplified 3-point scoring system for ICC [perfect (ICC = 0), moderate (ICC = 1–  
7 3), and poor (ICC ≥ 4)] was used in our trial<sup>[31]</sup>. The FLACC assessment tool was also administered  
8 to measure postoperative pain at the same time as PAED. The FLACC scale scores the pain intensity  
9 by rating five behaviors (face, legs, activity, consolability and cry) to derive a score out of 10.<sup>[32]</sup>  
10 For the patients suffering from ED, the first measure was to comfort the patients with words. When  
11 this failed, the patients were treated with propofol (10-20 mg IV). If a child exhibited signs of pain  
12 with a FLACC scale > 4, sufentanil (0.05 µg/kg IV) was administered as rescue medication.  
13  
14  
15  
16  
17  
18

### 19 Statistical analysis

20 For the sample size calculation, we used a proportion of ED and anxiety of 50%, as reported in  
21 previously published studies<sup>[2, 33]</sup>. Therefore, 40 subjects per group would have a significance level  
22 of 5% and a power of 80% in detecting a 30% reduction in ED incidence between the groups. While  
23 anticipating a 15% dropout rate, we estimated that 46 patients were needed in each group.  
24  
25

26 SPSS 26.0 statistical software was used to statistically process and analyze the data. The  
27 measurement data conforming to the normal distribution were expressed as the mean ± standard  
28 deviation, and the comparison between the groups was performed by two independent samples t  
29 test. Enumeration data were expressed by the number of patients (percentage) [n(%)], and the  
30 comparison was made by Chi-Squared Test. The comparison of measurement data that did not  
31 conform to a normal distribution was expressed by a nonparametric test and is shown as the median  
32 (25th percentile, 75th percentile).  
33  
34  
35

36 The changes of anxiety and emergence delirium over time between two groups were evaluated by  
37 generalized linear mixed models (GLMM) with logistic link followed by pairwise comparisons with  
38 Bonferroni correction. Linear mixed model (LMM) was used to evaluate the change of pain for  
39 comparison of FLACC. Both GLMM with logistic link and LMM were adjusted for age, gender,  
40 surgery type and length of surgery and anesthesia. Taking  $\alpha=0.05$  as the test level,  $P<0.05$  indicates  
41 a statistically significant difference.  
42  
43  
44  
45

### 46 Results

47 As shown in the Consort flow chart (Figure 1), 95 children were enrolled in our study, and 15  
48 children were excluded because of withdrawal of consent, loss of follow-up, discontinued  
49 intervention or extra medication. Thus, 80 participants completed the study and were included in  
50 the final data analysis. There were no statistically significant differences between the groups in  
51 terms of age, gender, height, weight, duration of surgery and anesthesia or the type of surgery (Table  
52 1).  
53  
54  
55

56 The incidence of anxiety was significantly different over time among children ( $F=3.212$ ,  $P=0.023$ ).  
57 There is also a significant difference in the incidence of anxiety between group V and group C  
58 ( $F=34.943$ ,  $P < 0.001$ ) (Figure 2, Table 2). Moreover, the interaction effect between time and group  
59  
60

1  
2  
3  
4 was statistically significant ( $F=8.126$ ,  $P < 0.001$ )(Table 2). The incidence of anxiety at T0 exhibiting  
5  
6 baseline anxiety was not statistically different between the groups ( $P = 0.323$ ). After the intervention,  
7 the incidence of anxiety of group V is significantly lower than that of group C at T1 ( $P < 0.001$ ), T2  
8  
9 ( $P < 0.001$ ) and T6 ( $P < 0.001$ ) ( Figure 2 ) . Meanwhile, the peak mYPAS scores showed  
10  
11 significant difference between the two groups ( $P < 0.001$ ) (Table 2).  
12  
13

14 The incidence of ED was significantly different over time among children ( $F=15.688$ ,  $P < 0.001$ ).  
15  
16 However, the incidence of ED between the groups and the interaction effect between time and group  
17 were not statistically different ( $F=2.169$ ,  $P=0.142$ ;  $F=1.220$ ,  $P=0.302$ ). Additionally, the peak of  
18 PAED in group V was significantly lower than that in group C ( $P=0.016$ ) (Table 3).  
19  
20

21 The FLACC score was significantly decreased over time among children ( $F=3.870$ ,  $P=0.010$ ).  
22  
23 However, the FLACC scores between the groups and the interaction effect between time and group  
24 were not statistically different ( $F=0.059$ ,  $P=0.808$ ;  $F=1.381$ ,  $P=0.249$ ). Similarly, the ICC and the  
25 incidence of adverse events were not found to be significantly different ( $P=0.110$ ,  $P=0.692$ ) (Table  
26  
27 4).  
28

## 29 Discussion

30 In the present study, we found that individual cartoon videos can significantly reduce the incidence  
31 of perioperative anxiety and alleviate ED in pediatric patients undergoing adenoidectomy and  
32 adenotonsillectomy.  
33  
34

35  
36 As demonstrated in Figure2, the incidence of anxiety at T0 was not significantly different between  
37 the two groups. The individual cartoon video helped the children in group V reduce anxiety at T1.  
38 While the incidence of anxiety at T1 in group C was higher than that at T0. This indicates that  
39 simply watching the individual cartoon video at holding area may have been sufficient to reduce  
40 anxiety during entry into the operation room. Without the impact of intervention measure, the  
41 children in group C showed the increasing levels of anxiety. While children who watched the  
42 individual cartoon video had lower levels of anxiety at T1, T2 and T6 compared to that at T0. These  
43 findings are sufficient to demonstrate a strong benefit of individual cartoon video by reducing the  
44 anxiety of pediatric patients during the whole perioperative period. Kain<sup>[4]</sup> pointed out an important  
45 correlation between emergence delirium and preoperative anxiety in children: for every 10-point  
46 increase in the mYPAS, the risk of delirium increases by 10%. A previous study<sup>[34]</sup> suggested that  
47 preoperative anxiety was one of the risk factors for ED. Thus, interventions aimed at alleviating  
48 preoperative anxiety are of great significance for preventing ED. However, few studies evaluated  
49 the effect of non-pharmacological approaches especially the technology devices in reducing the  
50 emergence delirium. In our study, analyzing the emergence delirium in the generalized linear mixed  
51 models (GLMM) with logistic link, we did not find the significant difference in the groups and the  
52 interaction effect between time and group. When comparing the peak PAED scores between the  
53 groups, we found that the degree of ED in group V is significantly lower than that in group C. These  
54 results show that the individual cartoon video can only alleviate the severity of ED and fails to  
55  
56  
57  
58  
59  
60

1  
2  
3 reduce the incidence of ED. Our study may not have been powered to fully demonstrate the  
4 association of other factors with anxiety and emergence delirium, such as age, gender, surgery type  
5 and length of surgery and anesthesia. In the study, these factors did not differ between the two  
6 groups, had no impact in the multivariable analysis, and thus did not impact our conclusions. There  
7 were no significant differences in the incidence of adverse events between the two groups. However,  
8 previous studies<sup>[35]</sup> have found that ED increases the risk of these adverse events. The possible  
9 reason is that our study may be limited by the sample size. We calculated the sample size with the  
10 incidence of ED and anxiety, and a larger sample size is required for determining differences in  
11 adverse events.  
12  
13  
14  
15

16 Most young children are very fond of watching cartoon videos. A favorite cartoon can immerse  
17 children in videos and distract their attention from the unfamiliar environment and the absence of  
18 their parents so that children will not cry because of fear and anxiety. Meanwhile, many popular  
19 cartoons are freely available with public access. Therefore, the intervention of watching individual  
20 cartoons to reduce anxiety can be used without increasing health care costs. Gamze Inan<sup>[36]</sup>  
21 demonstrated 3 different distraction techniques on the pain and anxiety levels of children during  
22 venipuncture, in which there are only several popular fixed options, whether in cartoon movies or  
23 video games. Jeongwoo Lee<sup>[22]</sup> similarly preselected 10 movies, including 4 action movies, 4 comics,  
24 1 science fiction and Cinderella, in his study about the effect of cartoon distraction on pediatric  
25 surgical patients. In our study, we did not limit the number and types of cartoon videos. We  
26 determined the patients' favorite cartoon video one day before the operation and downloaded it in  
27 advance. In this way, the intervention for anxiety will be targeted, and the effect will be maximized.  
28  
29  
30  
31  
32

33 Katherine A<sup>[12]</sup> showed that the children in the group with video distraction displayed significantly  
34 less anxiety at anesthetic induction and had a smaller increase in anxiety from the holding area to  
35 induction than those in the standard care group. Patel<sup>[16]</sup> et al. also demonstrated that animated  
36 cartoon distraction produced a significant reduction in anxiety in children aged 4 to 12 years  
37 compared with the intervention of oral premedication or parental presence. These findings are  
38 consistent with our findings. We noticed that many studies focused only on preoperative anxiety  
39 and ignored the postoperative status of the patient's anxiety. In daily work, we observed that some  
40 pediatric patients often cry and scream after surgery. We speculate that they may long for the  
41 company of their parents, which could also be a form of anxiety. In our study, we found that the  
42 pediatric patients in the control group displayed more anxiety when they departed from the PACU  
43 than the patients who watched the individual cartoon videos. As a result, the individual cartoon  
44 videos play a key role in alleviating anxiety in the whole perioperative period.  
45  
46  
47  
48  
49

50 Video display for pediatric patients has been an emerging audiovisual distraction modality to reduce  
51 anxiety. Initial studies in audiovisual distraction during induction of anesthesia in pediatric patients  
52 used video games, apps and streaming video clips to demonstrate reductions in mYPAS scores<sup>[12,</sup>  
53 <sup>16, 17]</sup>. We innovatively chose the individual cartoon video as the intervention throughout the whole  
54 perioperative period to evaluate the anxiety and ED. Thus, the purpose and findings of this study  
55 complement existing literature examining perioperative psychological and mental state of children  
56 and offer a fresh approach to relieve perioperative anxiety and ED in pediatric patients.  
57  
58  
59  
60

1  
2  
3 In terms of the strengths of this study, first of all, the individual cartoon video is an easy and effective  
4 modality which can capture children's attention to the maximum extent and is freely available with  
5 public access. Secondly, the established outcome scales we used are validated and behavior based  
6 to reduce observer bias. Thirdly, we included a time point after surgery to evaluate the anxiety in  
7 children and ultimately confirmed that the individual cartoon video can reduce anxiety throughout  
8 the whole perioperative period.  
9  
10

11  
12 Several limitations related to this study should also be discussed. One limitation is that the outcomes  
13 were limited to the immediate period. Though it has been proved that the negative psychological  
14 impact of perioperative anxiety can stretch beyond the perioperative period and includes  
15 maladaptive postoperative behaviors, such as separation anxiety, nightmares and eating disorders<sup>[37-  
16 40]</sup>, it remains unclear whether interventions aimed at reducing preoperative anxiety would lead to a  
17 decrease in such behaviors. Besides, the sample size of study is relatively limited. We found no  
18 significant difference of adverse events between the two groups. The most likely reason is that we  
19 calculated the sample size based on the incidence of ED and anxiety. Thus, the number of children  
20 recruited may have been insufficient to detect the effects of the individual cartoon videos on  
21 postoperative adverse events. Thirdly, though the trained investigator was blinded to the group  
22 allocation before assessment, the blinding was impossible at some time points because cartoon video  
23 watching were visible to the investigator. As a result, observer bias may have influenced  
24 assessments of anxiety, emergence delirium, pain and compliance at induction of anesthesia.  
25  
26  
27  
28  
29

30  
31 On the basis of our findings, future directions for further studies include longer postoperative  
32 follow-up, larger sample size and more application fields, including pediatric cardiovascular and  
33 cerebrovascular intervention therapies, radiological examinations and endoscopic examinations and  
34 treatments outside the operation room.  
35  
36

### 37 **Conclusion**

38 We concluded that the individual cartoon video was demonstrated to be an easy, effective and  
39 noninvasive modality for perioperative anxiety and emergence delirium in pediatric patients.  
40  
41

### 42 **Acknowledgements**

43 The authors thank all nurses and anesthetists for their participation in the study.  
44  
45

### 46 **Funding statement**

47 This work is supported by the Second Affiliated Hospital of Anhui Medical University and Hefei  
48 Research Institute of Chinese Academy of Sciences (202004), Anhui Provincial Health  
49 Commission (AHWJ2021a017), Education Department of Anhui Province (KJ2021ZD0030).  
50  
51

### 52 **Assistance with the study**

53 none.  
54  
55

### 56 **Author contributions**

57 Xinyu Tang and Muchun Zhang contributed equally to this paper.  
58

59 All authors contributed to the study conception and design. Material preparation and data  
60



1  
2  
3 collection were performed by Xinchun Tao, Yamei Li, Yi Wang and Xin Wang. Data analysis was  
4 conducted by Xinyu Tang and Muchun Zhang. The first draft of the manuscript was written by  
5 Xinyu Tang and Muchun Zhang and all authors commented on previous versions of the  
6 manuscript. All authors read and approved the final manuscript.  
7  
8  
9

### 10 **Competing interests statement**

11 All authors declare that they have no competing interests.  
12

### 13 **Ethics Statement**

14 This clinical trial was approved by the Ethics Committee of the Second Hospital of Anhui Medical  
15 University (Reference number: YX2022-084 (F1)) and was registered at the Chinese Clinical Trial  
16 Registry (Reference number: ChiCTR2200062300). The study was performed in accordance with  
17 the Helsinki Declaration of 1964, and its later amendments. Written consent was obtained from  
18 parents (or guardians).  
19  
20  
21  
22

### 23 **Data availability statement**

24 The data to support the results of this study is available from the corresponding author on  
25 reasonable request.  
26

### 27 **Prior presentation**

28 none  
29

### 30 **References**

- 31  
32 [1] BANCHS R J, LERMAN J. Preoperative anxiety management, emergence delirium,  
33 and postoperative behavior [J]. *Anesthesiol Clin*, 2014, 32(1): 1-23.  
34  
35 [2] KAIN Z N, MAYES L C, O'CONNOR T Z, et al. Preoperative anxiety in children.  
36 Predictors and outcomes [J]. *Arch Pediatr Adolesc Med*, 1996, 150(12): 1238-45.  
37  
38 [3] CHIENG Y J, CHAN W C, LIAM J L, et al. Exploring influencing factors of postoperative  
39 pain in school-age children undergoing elective surgery [J]. *J Spec Pediatr Nurs*, 2013,  
40 18(3): 243-52.  
41  
42 [4] KAIN Z N, CALDWELL-ANDREWS A A, MARANETS I, et al. Preoperative anxiety and  
43 emergence delirium and postoperative maladaptive behaviors [J]. *Anesth Analg*, 2004,  
44 99(6): 1648-54.  
45  
46 [5] KIM J E, JO B Y, OH H M, et al. High anxiety, young age and long waits increase the  
47  
48  
49  
50  
51  
52  
53  
54  
55  
56  
57  
58  
59  
60

- 1  
2  
3  
4 need for preoperative sedatives in children [J]. *J Int Med Res*, 2012, 40(4): 1381-9.  
5  
6 [6] HEIKAL S, STUART G. Anxiolytic premedication for children [J]. *BJA Education*, 2020,  
7  
8  
9 20(7): 220-5.  
10  
11 [7] AGBAYANI C G, FORTIER M A, KAIN Z N. Non-pharmacological methods of reducing  
12  
13 perioperative anxiety in children [J]. *BJA Educ*, 2020, 20(12): 424-30.  
14  
15 [8] CHOW C H, VAN LIESHOUT R J, SCHMIDT L A, et al. Systematic Review: Audiovisual  
16  
17 Interventions for Reducing Preoperative Anxiety in Children Undergoing Elective  
18  
19 Surgery [J]. *J Pediatr Psychol*, 2016, 41(2): 182-203.  
20  
21  
22 [9] LOW D K, PITTAWAY A P. The 'iPhone' induction - a novel use for the Apple iPhone  
23  
24  
25 [J]. *Paediatr Anaesth*, 2008, 18(6): 573-4.  
26  
27  
28 [10] KENNEDY N, MCDONNELL J G. Cartoons and the art of paediatric inhalational  
29  
30  
31 induction [J]. *Anaesthesia*, 2010, 65(12): 1233.  
32  
33  
34 [11] KERIMOGLU B, NEUMAN A, PAUL J, et al. Anesthesia induction using video glasses  
35  
36  
37 as a distraction tool for the management of preoperative anxiety in children [J]. *Anesth*  
38  
39  
40 *Analg*, 2013, 117(6): 1373-9.  
41  
42  
43 [12] MIFFLIN K A, HACKMANN T, CHORNEY J M. Streamed video clips to reduce anxiety  
44  
45  
46 in children during inhaled induction of anesthesia [J]. *Anesth Analg*, 2012, 115(5):  
47  
48 1162-7.  
49  
50  
51 [13] FORTIER M A, BUNZLI E, WALTHALL J, et al. Web-based tailored intervention for  
52  
53  
54 preparation of parents and children for outpatient surgery (WebTIPS): formative  
55  
56  
57 evaluation and randomized controlled trial [J]. *Anesth Analg*, 2015, 120(4): 915-22.  
58  
59 [14] TOURIGNY J, CHARTRAND J. [Evaluation of a preoperative virtual tour for parents  
60

- 1  
2  
3  
4 and children] [J]. *Rech Soins Infirm*, 2009, (96): 52-7.  
5  
6  
7 [15] LACQUIERE D A, COURTMAN S. Use of the iPad in paediatric anaesthesia [J].  
8  
9 *Anaesthesia*, 2011, 66(7): 629-30.  
10  
11 [16] PATEL A, SCHIEBLE T, DAVIDSON M, et al. Distraction with a hand-held video game  
12  
13 reduces pediatric preoperative anxiety [J]. *Paediatr Anaesth*, 2006, 16(10): 1019-27.  
14  
15 [17] LIGUORI S, STACCHINI M, CIOFI D, et al. Effectiveness of an App for Reducing  
16  
17 Preoperative Anxiety in Children: A Randomized Clinical Trial [J]. *JAMA Pediatr*, 2016,  
18  
19 170(8): e160533.  
20  
21  
22  
23  
24 [18] COHEN L L, BLOUNT R L, PANOPOULOS G. Nurse coaching and cartoon distraction:  
25  
26 an effective and practical intervention to reduce child, parent, and nurse distress during  
27  
28 immunizations [J]. *J Pediatr Psychol*, 1997, 22(3): 355-70.  
29  
30  
31  
32 [19] MACLAREN J E, COHEN L L. A comparison of distraction strategies for venipuncture  
33  
34 distress in children [J]. *J Pediatr Psychol*, 2005, 30(5): 387-96.  
35  
36  
37 [20] JUNG M J, LIBAW J S, MA K, et al. Pediatric Distraction on Induction of Anesthesia  
38  
39 With Virtual Reality and Perioperative Anxiolysis: A Randomized Controlled Trial [J].  
40  
41 *Anesth Analg*, 2021, 132(3): 798-806.  
42  
43  
44 [21] HARTER V, BARKMANN C, WIESSNER C, et al. Effects of Educational Video on Pre-  
45  
46 operative Anxiety in Children - A Randomized Controlled Trial [J]. *Front Pediatr*, 2021,  
47  
48 9: 640236.  
49  
50  
51  
52 [22] LEE J, LEE J, LIM H, et al. Cartoon distraction alleviates anxiety in children during  
53  
54 induction of anesthesia [J]. *Anesth Analg*, 2012, 115(5): 1168-73.  
55  
56  
57 [23] QUINTAO V C, CARLOS R V, KULIKOWSKI L D, et al. Association between adult and  
58  
59  
60

- 1  
2  
3  
4 child behavioral interactions with preoperative anxiety and emergence delirium [J].  
5  
6 Paediatr Anaesth, 2022.  
7  
8  
9 [24] JENKINS B N, FORTIER M A, KAPLAN S H, et al. Development of a short version of  
10  
11 the modified Yale Preoperative Anxiety Scale [J]. Anesth Analg, 2014, 119(3): 643-50.  
12  
13  
14 [25] KAIN Z N, MAYES L C, CICCHETTI D V, et al. The Yale Preoperative Anxiety Scale:  
15  
16 how does it compare with a "gold standard"? [J]. Anesth Analg, 1997, 85(4): 783-8.  
17  
18  
19 [26] SIKICH N, LERMAN J. Development and psychometric evaluation of the pediatric  
20  
21 anesthesia emergence delirium scale [J]. Anesthesiology, 2004, 100(5): 1138-45.  
22  
23  
24 [27] ALI M A, ABDELLATIF A A. Prevention of sevoflurane related emergence agitation in  
25  
26 children undergoing adenotonsillectomy: A comparison of dexmedetomidine and  
27  
28 propofol [J]. Saudi J Anaesth, 2013, 7(3): 296-300.  
29  
30  
31  
32 [28] SHI M, MIAO S, GU T, et al. Dexmedetomidine for the prevention of emergence  
33  
34 delirium and postoperative behavioral changes in pediatric patients with sevoflurane  
35  
36 anesthesia: a double-blind, randomized trial [J]. Drug Des Devel Ther, 2019, 13: 897-  
37  
38 905.  
39  
40  
41  
42 [29] CHEN J, LI W, HU X, et al. Emergence agitation after cataract surgery in children: a  
43  
44 comparison of midazolam, propofol and ketamine [J]. Paediatr Anaesth, 2010, 20(9):  
45  
46 873-9.  
47  
48  
49  
50 [30] RINGBLOM J, WAHLIN I, PROCZKOWSKA M. A psychometric evaluation of the  
51  
52 Pediatric Anesthesia Emergence Delirium scale [J]. Paediatr Anaesth, 2018, 28(4):  
53  
54 332-7.  
55  
56  
57  
58 [31] KAIN Z N, MAYES L C, WANG S M, et al. Parental presence during induction of  
59  
60

- 1  
2  
3  
4 anesthesia versus sedative premedication: which intervention is more effective? [J].  
5  
6 Anesthesiology, 1998, 89(5): 1147-56; discussion 9A-10A.  
7  
8  
9 [32] CRELLIN D J, HARRISON D, SANTAMARIA N, et al. The Psychometric Properties of  
10  
11 the FLACC Scale Used to Assess Procedural Pain [J]. J Pain, 2018, 19(8): 862-72.  
12  
13  
14 [33] CHANDLER J R, MYERS D, MEHTA D, et al. Emergence delirium in children: a  
15  
16 randomized trial to compare total intravenous anesthesia with propofol and remifentanyl  
17  
18 to inhalational sevoflurane anesthesia [J]. Paediatr Anaesth, 2013, 23(4): 309-15.  
19  
20  
21 [34] KIM J, KIM S Y, LEE J H, et al. Low-Dose Dexmedetomidine Reduces Emergence  
22  
23 Agitation after Desflurane Anaesthesia in Children Undergoing Strabismus Surgery [J].  
24  
25 Yonsei Med J, 2014, 55(2): 508-16.  
26  
27  
28  
29 [35] MALARBI S, STARGATT R, HOWARD K, et al. Characterizing the behavior of children  
30  
31 emerging with delirium from general anesthesia [J]. Pediatric Anesthesia, 2011, 21(9):  
32  
33 942-50.  
34  
35  
36  
37 [36] INAN G, INAL S. The Impact of 3 Different Distraction Techniques on the Pain and  
38  
39 Anxiety Levels of Children During Venipuncture: A Clinical Trial [J]. Clin J Pain, 2019,  
40  
41 35(2): 140-7.  
42  
43  
44  
45 [37] FORTIER M A, DEL ROSARIO A M, ROSENBAUM A, et al. Beyond pain: predictors  
46  
47 of postoperative maladaptive behavior change in children [J]. Paediatr Anaesth, 2010,  
48  
49 20(5): 445-53.  
50  
51  
52  
53 [38] FORTIER M A, DEL ROSARIO A M, MARTIN S R, et al. Perioperative anxiety in  
54  
55 children [J]. Paediatr Anaesth, 2010, 20(4): 318-22.  
56  
57  
58  
59 [39] KAIN Z N, MAYES L C, CALDWELL-ANDREWS A A, et al. Preoperative anxiety,  
60

postoperative pain, and behavioral recovery in young children undergoing surgery [J].

|                                         |               | Individual cartoon<br>video<br>(n = 40) | Control<br>(n = 40) | P<br>value |
|-----------------------------------------|---------------|-----------------------------------------|---------------------|------------|
| Age (years) <sup>a</sup>                |               | 5.75 ± 1.21                             | 5.68 ± 1.58         | 0.812      |
| Gender ( male )<br>[n (%)] <sup>b</sup> |               | 17 (42.5)                               | 23 (57.5)           | 0.18       |
| Height (cm) <sup>a</sup>                |               | 114.43 ± 9.24                           | 108.10 ± 11.92      | 0.319      |
| Weight (kg) <sup>a</sup>                |               | 21.47 ± 6.18                            | 21.63 ± 5.26        | 0.271      |
| Surgery length<br>( min ) <sup>a</sup>  |               | 34.45 ± 12.07                           | 34.63 ± 12.20       | 0.596      |
| Anesthesia<br>length (min) <sup>a</sup> |               | 47.35 ± 15.16                           | 46.23 ± 14.09       | 0.691      |
| Surgery [n (%)] <sup>b</sup>            |               |                                         |                     | 0.875      |
|                                         | Adenoidectomy | 15 (37.5)                               | 17 (42.5)           |            |
|                                         | Tonsillectomy | 10 (25)                                 | 10 (25)             |            |

Pediatrics, 2006, 118(2): 651-8.

- [40] KAIN Z N, WANG S M, MAYES L C, et al. Distress during the induction of anesthesia and postoperative behavioral outcomes [J]. Anesth Analg, 1999, 88(5): 1042-7.

|  |                                 |           |           |  |
|--|---------------------------------|-----------|-----------|--|
|  | Adenoidectomy+<br>Tonsillectomy | 15 (37.5) | 13 (32.5) |  |
|--|---------------------------------|-----------|-----------|--|

**Table 1.** Demographic and surgical characteristics of the pediatric patients between individual cartoon video group and control group

Data are presented as frequency (percentage) or mean  $\pm$  SD (Standard Deviation).

<sup>a</sup>two independent samples t test

<sup>b</sup>Chi-Squared Test

**Table 2.** Anxiety occurrence and levels in pediatric patients between individual cartoon video group and control group

|                         |           | Individual cartoon<br>video (n=40) | Control<br>(n=40)   | P value              |
|-------------------------|-----------|------------------------------------|---------------------|----------------------|
| Anxiety <sup>a</sup>    |           |                                    |                     | < 0.001*             |
|                         | T0 [n(%)] | 26(65)                             | 22(55)              |                      |
|                         | T1 [n(%)] | 8(20)                              | 32(80)              |                      |
|                         | T2 [n(%)] | 16(40)                             | 36(90)              |                      |
|                         | T6 [n(%)] | 21(52.5)                           | 35(87.5)            |                      |
| Peak_mYPAS <sup>b</sup> |           | 51.00 [41.67~60.89]                | 64.14 [53.57~85.47] | < 0.001 <sup>†</sup> |

\*P<sub>time</sub>=0.023 \*P<sub>group</sub> < 0.001 \*P<sub>interaction</sub> < 0.001

Data are presented as frequency (percentage) or median [25th percentile to 75th percentile] as appropriate.

<sup>a</sup>Generalized Linear Mixed Model(GLMM) with logistic link was adjusted for age, gender, surgery type and length of surgery and anesthesia.

<sup>b</sup>Mann–Whitney U-test

mYPAS, Modified Yale Preoperative Anxiety Scale

T0, preoperative holding area

T1, entry to the operating room

T2, induction of anesthesia

T6, leaving the PACU

mYPAS > 40 is considered as the occurrence of anxiety.

Peak\_mYPAS refers to the highest score of mYPAS in the four time points of T0, T1, T2 and T6.

\*P < 0.05 is significant in GLMM with logistic link.

†P < 0.05 versus the control group.

**Table3.** Emergence delirium occurrence and levels in pediatric patients between individual cartoon video group and control group

|                        |           | Individual cartoon video (n=40) | Control (n=40)      | P value            |
|------------------------|-----------|---------------------------------|---------------------|--------------------|
| ED <sup>a</sup>        |           |                                 |                     | 0.302              |
|                        | T3 [n(%)] | 22(55)                          | 31(77.5)            |                    |
|                        | T4 [n(%)] | 13(32.5)                        | 22(55)              |                    |
|                        | T5 [n(%)] | 9(22.5)                         | 10(25)              |                    |
|                        | T6 [n(%)] | 6(15)                           | 5(12.5)             |                    |
| Peak_PAED <sup>b</sup> |           | 12.00 [9.00~13.00]              | 13.50 [10.00~15.00] | 0.016 <sup>†</sup> |

\*P<sub>time</sub> < 0.001 P<sub>group</sub>=0.142 P<sub>interaction</sub>=0.302



Data are presented as frequency (percentage) or median [25th percentile to 75th percentile] as appropriate.

<sup>a</sup>Generalized Linear Mixed Model (GLMM) with logistic link was adjusted for age, gender, surgery type and length of surgery and anesthesia.

<sup>b</sup>Mann–Whitney U-test

PAED, the Pediatric Anesthesia Emergence Delirium scale

T3, immediately after extubation

T4, arriving in the PACU

T5, 30 min after arriving in the PACU

T6, leaving the PACU

Peak\_PAED refers to the highest score of PAED in the four time points of T3, T4, T5 and T6.

PAED  $\geq$  10 is considered as the occurrence of emergence delirium.

\*P < 0.05 is significant in GLMM with logistic link.

†P < 0.05 versus the control group.

**Table 4.** Secondary outcomes of the pediatric patients between individual cartoon video group and control group

|                    |    | Individual cartoon video<br>(n = 40) | Control<br>(n = 40) | P value |
|--------------------|----|--------------------------------------|---------------------|---------|
| FLACC <sup>a</sup> |    |                                      |                     | 0.249   |
|                    | T3 | 3.00 [1.25~4.75]                     | 3.50 [2.00~5.00]    |         |
|                    | T4 | 3.00 [1.00~5.00]                     | 3.50 [2.00~5.75]    |         |
|                    | T5 | 2.50 [1.00~4.00]                     | 3.00 [2.00~5.00]    |         |
|                    | T6 | 2.00 [1.00~3.75]                     | 3.00 [1.00~4.00]    |         |

|                                     |  |                  |                  |       |
|-------------------------------------|--|------------------|------------------|-------|
| ICC <sup>b</sup>                    |  | 2.00 [0.00~4.00] | 3.00 [1.25~4.00] | 0.11  |
| Adverse events <sup>c</sup> [n (%)] |  | 3 (7.5)          | 4 (10)           | 0.692 |

\*P<sub>time</sub>=0.010 P<sub>group</sub>=0.808 P<sub>interaction</sub>=0.249

Data are presented as frequency (percentage) or median [25th percentile to 75th percentile] as appropriate.

<sup>a</sup>Linear Mixed Model(LMM) was adjusted for age, gender, surgery type and length of surgery and anesthesia.

<sup>b</sup>Mann–Whitney U-test

<sup>c</sup>Chi-Squared Test

FLACC, Face, Legs, Activity, Consolability, Cry scale

T3, immediately after extubation

T4, arriving in the PACU

T5, 30 min after arriving in the PACU

T6, leaving the PACU

ICC, induction compliance checklist

Adverse events refer to severe hypoxemia, bronchospasm, postoperative bleeding, etc.

\*P < 0.05 is significant in LMM.

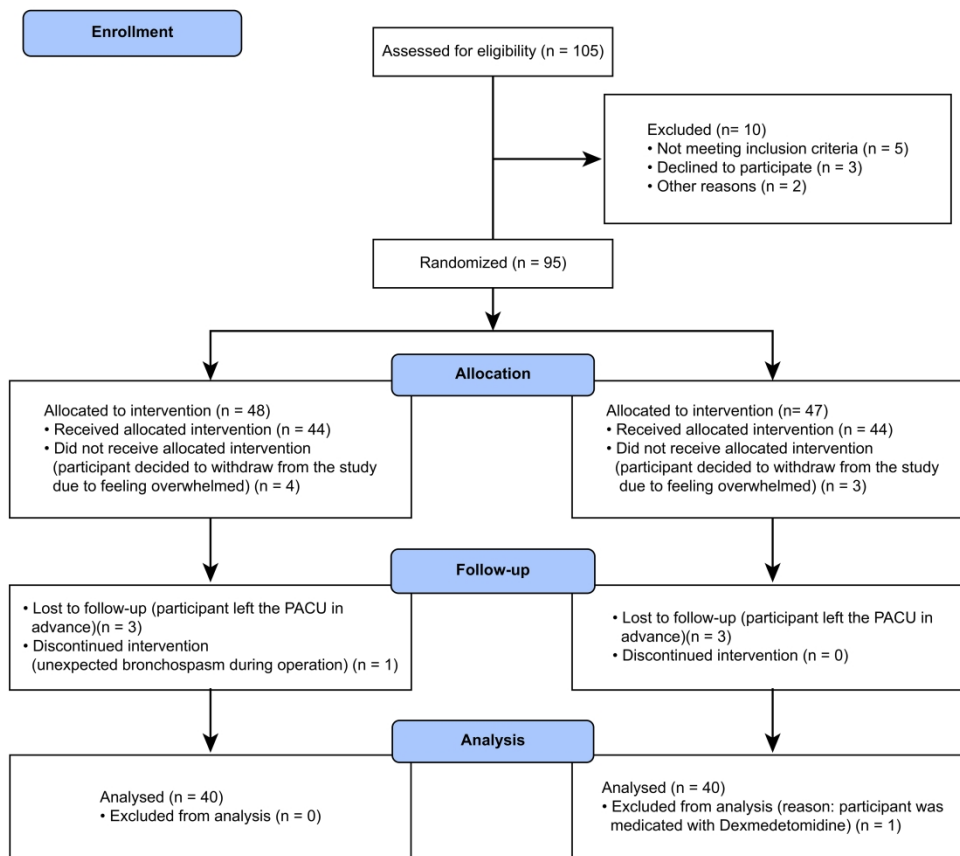

CONSORT flow diagram of the study.

179x157mm (580 x 580 DPI)

1  
2  
3  
4  
5  
6  
7  
8  
9  
10  
11  
12  
13  
14  
15  
16  
17  
18  
19  
20  
21  
22  
23  
24  
25  
26  
27  
28  
29  
30  
31  
32  
33  
34  
35  
36  
37  
38  
39  
40  
41  
42  
43  
44  
45  
46  
47  
48  
49  
50  
51  
52  
53  
54  
55  
56  
57  
58  
59  
60

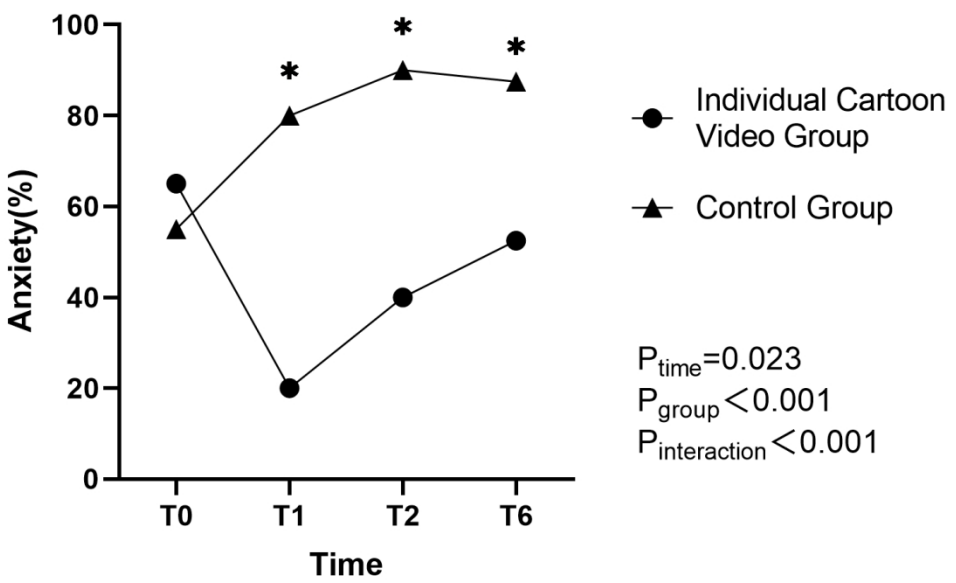

Figure2: Anxiety occurrence in pediatric patients in the perioperative period  
□P<0.001 versus the control group

132x84mm (300 x 300 DPI)

# BMJ Paediatrics Open

## Individual Cartoon Video for Alleviating Perioperative Anxiety and Reducing Emergence Delirium in Children: A Prospective Randomized Trial

|                               |                                                                                                                                                                                                                                                                                                                                                                                                                                                                                                                                                                                                                                                                                                                                                                                                                                                                                                                                                                                                                                                                                        |
|-------------------------------|----------------------------------------------------------------------------------------------------------------------------------------------------------------------------------------------------------------------------------------------------------------------------------------------------------------------------------------------------------------------------------------------------------------------------------------------------------------------------------------------------------------------------------------------------------------------------------------------------------------------------------------------------------------------------------------------------------------------------------------------------------------------------------------------------------------------------------------------------------------------------------------------------------------------------------------------------------------------------------------------------------------------------------------------------------------------------------------|
| Journal:                      | <i>BMJ Paediatrics Open</i>                                                                                                                                                                                                                                                                                                                                                                                                                                                                                                                                                                                                                                                                                                                                                                                                                                                                                                                                                                                                                                                            |
| Manuscript ID                 | bmjpo-2023-001854.R2                                                                                                                                                                                                                                                                                                                                                                                                                                                                                                                                                                                                                                                                                                                                                                                                                                                                                                                                                                                                                                                                   |
| Article Type:                 | Original research                                                                                                                                                                                                                                                                                                                                                                                                                                                                                                                                                                                                                                                                                                                                                                                                                                                                                                                                                                                                                                                                      |
| Date Submitted by the Author: | 22-May-2023                                                                                                                                                                                                                                                                                                                                                                                                                                                                                                                                                                                                                                                                                                                                                                                                                                                                                                                                                                                                                                                                            |
| Complete List of Authors:     | <p>Tang, Xinyu; The Second Hospital of Anhui Medical University, Department of Anesthesiology; Key Laboratory of Anesthesiology and Perioperative Medicine of Anhui Higher Education Institutes, Anhui Medical University</p> <p>Zhang, Muchun; The Second Hospital of Anhui Medical University, Department of Anesthesiology; Key Laboratory of Anesthesiology and Perioperative Medicine of Anhui Higher Education Institutes, Anhui Medical University</p> <p>Yang, Lizhuang; Anhui Province Key Laboratory of Medical Physics and Technology, Institute of Health and Medical Technology, Hefei Institutes of Physical Science, Chinese Academy of Sciences</p> <p>Tao, Xinchun; Anhui Medical University</p> <p>Li, Yamei; Anhui Medical University</p> <p>Wang, Yi; Anhui Medical University</p> <p>Wang, Xin; Anhui Medical University</p> <p>Hu, Xianwen; Second Affiliated Hospital of Anhui Medical University, Department of Anesthesiology; Key Laboratory of Anesthesiology and Perioperative Medicine of Anhui Higher Education Institutes, Anhui Medical University</p> |
| Keywords:                     | Anesthesia, Adolescent Health                                                                                                                                                                                                                                                                                                                                                                                                                                                                                                                                                                                                                                                                                                                                                                                                                                                                                                                                                                                                                                                          |
|                               |                                                                                                                                                                                                                                                                                                                                                                                                                                                                                                                                                                                                                                                                                                                                                                                                                                                                                                                                                                                                                                                                                        |

SCHOLARONE™  
Manuscripts



I, the Submitting Author has the right to grant and does grant on behalf of all authors of the Work (as defined in the below author licence), an exclusive licence and/or a non-exclusive licence for contributions from authors who are: i) UK Crown employees; ii) where BMJ has agreed a CC-BY licence shall apply, and/or iii) in accordance with the terms applicable for US Federal Government officers or employees acting as part of their official duties; on a worldwide, perpetual, irrevocable, royalty-free basis to BMJ Publishing Group Ltd ("BMJ") its licensees and where the relevant Journal is co-owned by BMJ to the co-owners of the Journal, to publish the Work in this journal and any other BMJ products and to exploit all rights, as set out in our [licence](#).

The Submitting Author accepts and understands that any supply made under these terms is made by BMJ to the Submitting Author unless you are acting as an employee on behalf of your employer or a postgraduate student of an affiliated institution which is paying any applicable article publishing charge ("APC") for Open Access articles. Where the Submitting Author wishes to make the Work available on an Open Access basis (and intends to pay the relevant APC), the terms of reuse of such Open Access shall be governed by a Creative Commons licence – details of these licences and which [Creative Commons](#) licence will apply to this Work are set out in our licence referred to above.

Other than as permitted in any relevant BMJ Author's Self Archiving Policies, I confirm this Work has not been accepted for publication elsewhere, is not being considered for publication elsewhere and does not duplicate material already published. I confirm all authors consent to publication of this Work and authorise the granting of this licence.

1  
2  
3  
4 **Title page**  
5

6 **Individual Cartoon Video for Alleviating Perioperative Anxiety and Reducing Emergence**  
7 **Delirium in Children: A Prospective Randomized Trial**  
8

9 **Authors**  
10

11 Xinyu Tang<sup>1,2</sup>, Muchun Zhang<sup>1,2</sup>, Lizhuang Yang<sup>3</sup>, Xinchun Tao<sup>4</sup>, Yamei Li<sup>4</sup>, Yi Wang<sup>4</sup>, Xin  
12 Wang<sup>4</sup>, Xianwen Hu<sup>1,2</sup>,  
13

14  
15 1. Department of Anesthesiology, The Second Hospital of Anhui Medical University, Hefei  
16 230601, China  
17

18  
19 2. Key Laboratory of Anesthesiology and Perioperative Medicine of Anhui Higher Education  
20 Institutes, Anhui Medical University, Anhui 230601, China  
21

22  
23 3. Anhui Province Key Laboratory of Medical Physics and Technology, Institute of Health and  
24 Medical Technology, Hefei Institutes of Physical Science, Chinese Academy of Sciences. Anhui  
25 230088, China  
26  
27

28 4. Anhui Medical University, Hefei 230000, China  
29

30 Xinyu Tang

31 E-mail: [xinyutang325@foxmail.com](mailto:xinyutang325@foxmail.com)  
32

33 Muchun Zhang

34 E-mail: [835367969@qq.com](mailto:835367969@qq.com)  
35

36 Lizhuang Yang

37 E-mail: [lzyang@ustc.edu.cn](mailto:lzyang@ustc.edu.cn)  
38

39 Xinchun Tao

40 E-mail: [taoxinchun2023@163.com](mailto:taoxinchun2023@163.com)  
41

42 Yamei Li

43 E-mail: [lym\\_0106@163.com](mailto:lym_0106@163.com)  
44

45 Yi Wang

46 E-mail: [13625635360@163.com](mailto:13625635360@163.com)  
47

48 Xin Wang

49 E-mail: [13866656039@163.com](mailto:13866656039@163.com)  
50

51 Xianwen Hu

52 E-mail: [huxianwen001@163.com](mailto:huxianwen001@163.com)  
53  
54  
55  
56  
57  
58  
59  
60

1  
2  
3 **Correspondence**

4 Xianwen Hu, Department of Anesthesiology, The Second Hospital of Anhui Medical University,  
5 Hefei 230601, China.

6  
7 E-mail address: [huxianwen001@163.com](mailto:huxianwen001@163.com) (X. Hu).  
8  
9

10 Xinyu Tang and Muchun Zhang contributed equally to this paper.  
11  
12  
13  
14  
15  
16  
17  
18  
19  
20  
21  
22  
23  
24  
25  
26  
27  
28  
29  
30  
31  
32  
33  
34  
35  
36  
37  
38  
39  
40  
41  
42  
43  
44  
45  
46  
47  
48  
49  
50  
51  
52  
53  
54  
55  
56  
57  
58  
59  
60

Confidential: For Review Only



## Abstract

**BACKGROUND:** Perioperative anxiety and emergence delirium in young children may cause a series of adverse events, which are worth investigating. Pharmacological treatments of anxiety and delirium remain uncertain, while nonpharmacological treatments lack personalization and pertinence.

**AIMS:** The aim of study was to determine whether an individual cartoon video can alleviate perioperative anxiety and reduce emergence delirium in young children undergoing adenoidectomy and tonsillectomy.

**METHODS:** Children between 3 and 7 years old undergoing adenoidectomy and tonsillectomy were randomly assigned to an individual cartoon video group (group V) or a control group (group C). In group V, an individual cartoon video of the child's own choice was played throughout the whole waiting, anesthesia induction and recovery periods. The children in group C were contacted through verbal conversation. The primary outcomes were anxiety measured by the Modified Yale Preoperative Anxiety Scale (mYPAS) and emergence delirium assessed by the Pediatric Anesthesia Emergence Delirium (PAED) scale. The secondary outcomes included cooperation during induction, postoperative pain and adverse events.

**RESULTS:** The incidence of anxiety were comparable in group V and group C at the holding area (T0)(26% vs. 22%,  $P=0.323$ ), but the incidence of anxiety of group V were significantly lower than those of group C at the time of entering the operating room (T1), during the induction of anesthesia (T2) and leaving the PACU (T6) ( $P<0.001$ ,  $P<0.001$ ,  $P<0.001$ ) after intervention. The peak PAED score in group V was significantly lower than that in group C (12.00 [9.00~13.00] vs. 13.50 [10.00~15.00],  $P=0.016$ ). We found no significant differences in cooperation during induction, postoperative pain or the incidence of adverse events between the groups (2.00 [0.00~4.00] vs. 3.00 [1.25~4.00],  $P=0.110$ ;  $F=0.059$ ,  $P_{\text{group}}=0.808$ ; 3 (7.5%) vs. 4 (10),  $P=0.692$ ).

**CONCLUSIONS:** The individual cartoon video is an effective method of reducing perioperative anxiety and alleviating emergence delirium in children.

### Ethics Approval Statement

This clinical trial was approved by the Ethics Committee of the Second Hospital of Anhui Medical University (Reference number: YX2022-084 (F1))

### Clinical Trial Registration Identifier

ChiCTR2200062300 (<https://www.chictr.org.cn/index.aspx>)

**KEY WORDS :** individual cartoon video ; anxiety ; emergence delirium ; pediatrics;

**What is already known about the topic?**

Anxiety and emergence delirium are commonly observed in young children and cause many adverse effects.

The effectiveness of pharmacological treatments of anxiety and emergence delirium remains uncertain, while the effectiveness of nonpharmacological treatments lacks personalization and pertinence.

**What new information this study adds?**

Using a child's favorite cartoon video can reduce the incidence of perioperative anxiety.

Using a child's favorite cartoon video may alleviate emergence delirium.

**How this study might affect the practice?**

The patients' favorite cartoon video can be played as the intervention for anxiety and emergence delirium, which will be targeted, easy-accessed and the effect will be maximized.

**Introduction**

Emergence delirium (ED) is described as a complex of perceptual disturbances and psychomotor agitation that most commonly observed in young children in the early postanesthetic period following a sevoflurane-based anesthetic<sup>[1]</sup>. While, anxiety is common in children before anesthesia and surgery. It has been reported that up to 65% of children in the holding area and during the induction of anesthesia experience intense anxiety about anesthesia and surgery<sup>[2]</sup>. Severe anxiety easily causes uncooperative behavior, severe pain, emergence delirium, and higher doses of sedation or preoperative analgesia<sup>[3-5]</sup>. Therefore, alleviating anxiety and reducing the incidence of ED in children are of great significance for ensuring perioperative safety and improving surgical prognosis.

Tailored treatment for perioperative anxiety of a pediatric patient can use either pharmacological or non-pharmacological methods, often in tandem. The use of anxiolytic premedication in particular is valuable for certain groups<sup>[6]</sup>, but the efficacy of these drugs is not clear, and the optimal dosage is unknown. In addition, due to the immaturity of children's physical and psychological development, pharmacological treatment has side effects and potential risks, and the compliance of young children in taking medication is low. Compared with pharmacological therapy, non-pharmacological interventions are more comfortable, safer and free of drug side effects<sup>[7]</sup>.

As a whole non-pharmacological modalities comprise education approaches, behavioral techniques, parental presence at induction of anesthesia (PPIA), and complementary and alternative medicine (CAM) techniques, with each category including a range of effective strategies for reducing anxiety<sup>[7]</sup>. Research has increasingly focused on exploring the effects of technology devices, especially based on audiovisual interventions<sup>[8]</sup>. These technology devices (eg, smartphones<sup>[9, 10]</sup>, video glasses<sup>[11]</sup>, streaming videoplayers<sup>[12]</sup>, portable computers<sup>[13, 14]</sup>, iPads<sup>[15]</sup>, and video games<sup>[16]</sup>) have been widely used as a vehicle for streaming media content(eg, video games, streaming video clips, apps<sup>[17]</sup>, virtual reality, and cartoons) to reduce perioperative anxiety in children through distraction.

Cohen et al. used cartoons as an effective distraction tool during surgical procedures in children and in another study demonstrated that playing age-appropriate videos before medical procedures was

1  
2  
3 a more effective distractor than was an interactive toy<sup>[18, 19]</sup>. Compared with premedication or  
4 parental presence only, a handheld video game with parental presence was found to be more  
5 effective for reducing anxiety in children aged 4 to 12 years<sup>[16]</sup>. A study also demonstrates that  
6 pediatric patients who used Virtual Reality (VR) were found to have significantly lower anxiety at  
7 the time of induction of anesthesia compared to patients who did not use VR<sup>[20]</sup>. However, we found  
8 that the choices of the videos<sup>[21]</sup>, handheld video games<sup>[16]</sup> or VR<sup>[20]</sup> in previous studies seemed to  
9 be impersonalized and limited. Most studies used the same media content as interventions,  
10 regardless of the gender and age of patients<sup>[20, 22]</sup>. Even if the selection is based on age and gender,  
11 it is possible that the children cannot find his favorite cartoon video in the options of his age due to  
12 individual differences. Meanwhile, it has been proved that one of the causes of emergence delirium  
13 was preoperative anxiety and that reducing preoperative anxiety can reduce the incidence of  
14 postoperative delirium<sup>[1, 23]</sup>. Therefore, some studies have focused only on how to reduce  
15 preoperative anxiety, while few have continued to pay attention to the anxiety of children who are  
16 awakening in the Post Anesthesia Care Unit (PACU)<sup>[1]</sup>.

22  
23 Therefore, this study was performed to emphatically determine whether individual cartoon videos  
24 are capable of alleviating perioperative anxiety and reducing emergence delirium in young children  
25 undergoing adenoidectomy and tonsillectomy. Simultaneously, the study also investigated the  
26 impact of individual cartoon videos on induction compliance, postoperative pain and adverse events.

## 27 **Methods**

### 28 **Ethics**

29  
30 This clinical trial was approved by the Ethics Committee of the Second Hospital of Anhui Medical  
31 University (Reference number: YX2022-084 (F1)) and was registered at the Chinese Clinical Trial  
32 Registry (Reference number: ChiCTR2200062300). Written consent was obtained from parents (or  
33 guardians). This single-center, randomized clinical trial was conducted from August to September  
34 2022 in accordance with the principles of the Helsinki Declaration.

### 35 **Participants**

36  
37 After the introduction and invitation of the clinical trial leader, ninety-five patients aged between 3  
38 and 7 years with an American Society of Anesthesiologists physical status I-II and who were  
39 scheduled for their first elective adenoidectomy or tonsillectomy under general anesthesia were  
40 enrolled. Children having emergency surgery and those with previous anesthetic experience,  
41 developmental delays, intellectual disability, sedative medication or chronic illnesses were excluded  
42 from the study.

### 43 **Patient and Public Involvement**

44  
45 Parents or the public were not directly involved in the design, conduct or plans for the  
46 dissemination of our research.

### 47 **Procedures**

48  
49 The day before surgery, the eligible patients were visited by a trained anesthesiologist, and their  
50 general information was recorded. Most importantly, through conversations with children, their  
51 favorite cartoon videos even specific to favorite clips were all recorded. There were no limits to the  
52

1  
2  
3 scope of cartoons, which were freely chosen according to children's preferences. On the day of  
4 surgery, all of the patients were brought to the holding area 30 min before surgery and treated  
5 according to the group assignment. The enrolled children were randomized into two groups using a  
6 computer-generated randomization program: group V (distraction by watching an individual  
7 cartoon video) and group C (control). The patients in group V began to watch a favorite cartoon  
8 video on iPad throughout the whole waiting and anesthesia induction process. Patients in group C  
9 were contacted by the medical staff through verbal conversation to relieve their anxiety.  
10  
11

12  
13  
14 The surgical interventions and the administration of anesthesia were always performed by the same  
15 professionals (two surgeons and an anesthesiologist), and standard anesthetic regimens and  
16 techniques were used for all patients. After the application of standard monitoring, including blood  
17 pressure, electrocardiography, blood oxygen saturation, and the bispectral index, inhalation  
18 anesthesia induction was performed at tidal volume, with incrementing sevoflurane up to 8% with  
19 a 50% mixture of air and oxygen (6 L/min). At the same time, the induction compliance checklist  
20 (ICC) score was recorded by a trained nurse. Peripheral IV access was obtained, and an  
21 appropriately sized laryngeal tube was inserted after a suitable anesthetic depth was obtained by the  
22 injection of propofol (2 mg/kg), sufentanil (0.2 µg/kg) and cisatracurium (0.1 mg/kg). Then,  
23 atropine (0.02 mg/kg) and dexamethasone (0.1 mg/kg) were administered, and anesthesia was  
24 maintained with remifentanyl 0.2-0.3 µg/kg/min and sevoflurane 3%-5% with a BIS target range of  
25 40-60. At the end of surgery, the children were extubated after awakening with adequate  
26 spontaneous ventilation and were transferred to the postanesthetic care unit (PACU) for observation.  
27 In group V, the individual cartoon video was continuously played in the early recovery stage until  
28 the children left the PACU and were reunited with their parents.  
29  
30  
31  
32  
33

### 34 Measures

35 Every assessment was completed by the same trained anesthesiologist who is blinded to the group  
36 allocation. The primary outcomes were perioperative pediatric anxiety measured by the Modified  
37 Yale Preoperative Anxiety Scale (mYPAS) and ED assessed by the Pediatric Anesthesia Emergence  
38 Delirium (PAED) scale. The mYPAS is a validated perioperative pediatric anxiety instrument with  
39 22 items in 5 categories (activity, emotional expressivity, state of arousal, vocalization, and use of  
40 parents)<sup>[24]</sup>. In terms of activity, this domain measures the child's level of activity or restlessness,  
41 for example, whether the child is fidgeting in their seat or moving around the room. The domain of  
42 emotional expressivity estimates the child's emotional state and expression, for example, the child  
43 is crying, worried or happy. In terms of state of arousal, this domain measures the child's  
44 physiological arousal, such as vigilance, sucking on thumb or panicked whimpering. The domain  
45 of vocalization investigates whether the child is reading, moaning, screaming, etc. And in terms of  
46 use of parents, it measures the child's reliance on their parents for comfort and support. Scores range  
47 from 23.33 to 100, with higher scores indicating higher levels of anxiety<sup>[25]</sup>. The mYPAS was  
48 administered at 4 time points: in the preoperative holding area (baseline, or T0), upon entering the  
49 operating room (T1), during the induction of anesthesia (T2) and upon leaving the PACU (T6).  
50 Behavior on emergence was measured using the pediatric anesthesia emergence delirium (PAED)  
51 scale<sup>[26]</sup>. A specially trained anesthesiologist assessed the PAED scale at 4 time points: immediately  
52 after extubation (T3), on arriving in the PACU (T4), 30 min after arriving in the PACU (T5) and on  
53 leaving the PACU (T6). ED was defined as PAED scores  $\geq 10$ , and PAED scores  $\geq 15$  is considered  
54  
55  
56  
57  
58  
59  
60

1  
2  
3 as the occurrence of severe ED<sup>[26-30]</sup>. The PAED scale was also used to measure the intensity of ED,  
4 where 0 represents no ED and 20 is the maximum intensity of ED. The induction compliance  
5 checklist (ICC) was used to assess the cooperation of the children during the induction of anesthesia  
6 (T2). A validated simplified 3-point scoring system for ICC [perfect (ICC = 0), moderate (ICC = 1–  
7 3), and poor (ICC ≥ 4)] was used in our trial<sup>[31]</sup>. The FLACC assessment tool was also administered  
8 to measure postoperative pain at the same time as PAED. The FLACC scale scores the pain intensity  
9 by rating five behaviors (face, legs, activity, consolability and cry) to derive a score out of 10.<sup>[32]</sup>  
10 For the patients suffering from ED, the first measure was to comfort the patients with words. When  
11 this failed, the patients were treated with propofol (10-20 mg IV). If a child exhibited signs of pain  
12 with a FLACC scale > 4, sufentanil (0.05 µg/kg IV) was administered as rescue medication.  
13  
14  
15  
16  
17  
18

### 19 Statistical analysis

20 For the sample size calculation, we used a proportion of ED and anxiety of 50%, as reported in  
21 previously published studies<sup>[2, 33]</sup>. Therefore, 40 subjects per group would have a significance level  
22 of 5% and a power of 80% in detecting a 30% reduction in ED incidence between the groups. While  
23 anticipating a 15% dropout rate, we estimated that 46 patients were needed in each group.  
24  
25

26 SPSS 26.0 statistical software was used to statistically process and analyze the data. The  
27 measurement data conforming to the normal distribution were expressed as the mean ± standard  
28 deviation, and the comparison between the groups was performed by two independent samples t  
29 test. Enumeration data were expressed by the number of patients (percentage) [n(%)], and the  
30 comparison was made by Chi-Squared Test. The comparison of measurement data that did not  
31 conform to a normal distribution was expressed by a nonparametric test and is shown as the median  
32 (25th percentile, 75th percentile).  
33  
34  
35

36 The changes of anxiety and emergence delirium over time between two groups were evaluated by  
37 generalized linear mixed models (GLMM) with logistic link followed by pairwise comparisons with  
38 Bonferroni correction. Linear mixed model (LMM) was used to evaluate the change of pain for  
39 comparison of FLACC. Both GLMM with logistic link and LMM were adjusted for age, gender,  
40 surgery type and length of surgery and anesthesia. Taking  $\alpha=0.05$  as the test level,  $P<0.05$  indicates  
41 a statistically significant difference.  
42  
43  
44  
45

### 46 Results

47 As shown in the Consort flow chart (Figure 1), 95 children were enrolled in our study, and 15  
48 children were excluded because of withdrawal of consent, loss of follow-up, discontinued  
49 intervention or extra medication. Thus, 80 participants completed the study and were included in  
50 the final data analysis. There were no statistically significant differences between the groups in  
51 terms of age, gender, height, weight, duration of surgery and anesthesia or the type of surgery (Table  
52 1).  
53  
54  
55

56 The incidence of anxiety was significantly different over time among children ( $F=3.212$ ,  $P=0.023$ ).  
57 There is also a significant difference in the incidence of anxiety between group V and group C  
58 ( $F=34.943$ ,  $P < 0.001$ ) (Figure 2, Table 2). Moreover, the interaction effect between time and group  
59  
60

1  
2  
3  
4 was statistically significant ( $F=8.126$ ,  $P < 0.001$ )(Table 2). The incidence of anxiety at T0 exhibiting  
5  
6 baseline anxiety was not statistically different between the groups ( $P = 0.323$ ). After the intervention,  
7 the incidence of anxiety of group V is significantly lower than that of group C at T1 ( $P < 0.001$ ), T2  
8  
9 ( $P < 0.001$ ) and T6 ( $P < 0.001$ ) ( Figure 2 ) . Meanwhile, the peak mYPAS scores showed  
10  
11 significant difference between the two groups ( $P<0.001$ ) (Table 2).  
12  
13

14 The incidence of ED was significantly different over time among children ( $F=15.688$ ,  $P < 0.001$ ).  
15  
16 However, the incidence of ED between the groups and the interaction effect between time and group  
17 were not statistically different ( $F=2.169$ ,  $P=0.142$ ;  $F=1.220$ ,  $P=0.302$ ). Additionally, the peak of  
18 PAED in group V was significantly lower than that in group C ( $P=0.016$ ) (Table 3).  
19  
20

21 The FLACC score was significantly decreased over time among children ( $F=3.870$ ,  $P=0.010$ ).  
22  
23 However, the FLACC scores between the groups and the interaction effect between time and group  
24 were not statistically different ( $F=0.059$ ,  $P=0.808$ ;  $F=1.381$ ,  $P=0.249$ ). Similarly, the ICC and the  
25 incidence of adverse events were not found to be significantly different ( $P=0.110$ ,  $P=0.692$ ) (Table  
26  
27 4).  
28

## 29 Discussion

30 In the present study, we found that individual cartoon videos can significantly reduce the incidence  
31 of perioperative anxiety and alleviate ED in pediatric patients undergoing adenoidectomy and  
32 adenotonsillectomy.  
33  
34

35  
36 As demonstrated in Figure2, the incidence of anxiety at T0 was not significantly different between  
37 the two groups. The individual cartoon video helped the children in group V reduce anxiety at T1.  
38 While the incidence of anxiety at T1 in group C was higher than that at T0. This indicates that  
39 simply watching the individual cartoon video at holding area may have been sufficient to reduce  
40 anxiety during entry into the operation room. Without the impact of intervention measure, the  
41 children in group C showed the increasing levels of anxiety. While children who watched the  
42 individual cartoon video had lower levels of anxiety at T1, T2 and T6 compared to that at T0. These  
43 findings are sufficient to demonstrate a strong benefit of individual cartoon video by reducing the  
44 anxiety of pediatric patients during the whole perioperative period.  
45  
46  
47  
48

49 Katherine A<sup>[12]</sup> showed that the children in the group with video distraction displayed significantly  
50 less anxiety at anesthetic induction and had a smaller increase in anxiety from the holding area to  
51 induction than those in the standard care group. This finding is consistent with our findings. We  
52 noticed that many studies focused only on preoperative anxiety and ignored the postoperative status  
53 of the patient's anxiety. In daily work, we observed that some pediatric patients often cry and scream  
54 after surgery. So we speculate that they may long for the company of their parents, which could also  
55 be a form of anxiety. In our study, we found that the pediatric patients in the control group displayed  
56 more anxiety when they departed from the PACU than the patients who watched the individual  
57 cartoon videos. As a result, the individual cartoon videos play a key role in alleviating anxiety in  
58  
59  
60

1  
2  
3 the whole perioperative period.  
4  
5

6 Kain<sup>[4]</sup> pointed out an important correlation between emergence delirium and preoperative anxiety  
7 in children: for every 10-point increase in the mYPAS, the risk of delirium increases by 10%. A  
8 previous study<sup>[34]</sup> suggested that preoperative anxiety was one of the risk factors for ED. Thus,  
9 interventions aimed at alleviating preoperative anxiety are of great significance for preventing ED.  
10 However, few studies evaluated the effect of non-pharmacological approaches especially the  
11 technology devices in reducing the emergence delirium.  
12  
13

14  
15 In our study, analyzing the emergence delirium in the generalized linear mixed models (GLMM)  
16 with logistic link, we did not find the significant difference in the groups and the interaction effect  
17 between time and group. When comparing the peak PAED scores between the groups, we found  
18 that the degree of ED in group V is significantly lower than that in group C. These results show that  
19 the individual cartoon video can only alleviate the severity of ED and fails to reduce the incidence  
20 of ED. Our study may not have been powered to fully demonstrate the association of other factors  
21 with anxiety and emergence delirium, such as age, gender, surgery type and length of surgery and  
22 anesthesia. In the study, these factors did not differ between the two groups, had no impact in the  
23 multivariable analysis, and thus did not impact our conclusions. There were no significant  
24 differences in the incidence of adverse events between the two groups. However, previous studies<sup>[35]</sup>  
25 have found that ED increases the risk of these adverse events. The possible reason is that our study  
26 may be limited by the sample size. We calculated the sample size with the incidence of ED and  
27 anxiety, and a larger sample size is required for determining differences in adverse events.  
28  
29  
30  
31  
32

33 Most young children are very fond of watching cartoon videos. A favorite cartoon can immerse  
34 children in videos and distract their attention from the unfamiliar environment and the absence of  
35 their parents so that children will not cry because of fear and anxiety. Meanwhile, many popular  
36 cartoons are freely available with public access. Therefore, the intervention of watching individual  
37 cartoons to reduce anxiety can be used without increasing health care costs. Gamze Inan<sup>[36]</sup>  
38 demonstrated 3 different distraction techniques on the pain and anxiety levels of children during  
39 venipuncture, in which there are only several popular fixed options, whether in cartoon movies or  
40 video games. In our study, we did not limit the number and types of cartoon videos. We determined  
41 the patients' favorite cartoon video one day before the operation and downloaded it in advance. In  
42 this way, the intervention for anxiety will be targeted, and the effect will be maximized.  
43  
44  
45  
46  
47

48 Video display for pediatric patients has been an emerging audiovisual distraction modality to reduce  
49 anxiety. Initial studies in audiovisual distraction during induction of anesthesia in pediatric patients  
50 used video games, apps and streaming video clips to demonstrate reductions in mYPAS scores<sup>[12,</sup>  
51 <sup>16, 17]</sup>. We innovatively chose the individual cartoon video as the intervention throughout the whole  
52 perioperative period to evaluate the anxiety and ED. Thus, the purpose and findings of this study  
53 complement existing literature examining perioperative psychological and mental state of children  
54 and offer a fresh approach to relieve perioperative anxiety and ED in pediatric patients.  
55  
56  
57

58 In terms of the strengths of this study, first of all, the individual cartoon video is an easy and effective  
59 modality which can capture children's attention to the maximum extent and is freely available with  
60

1  
2  
3 public access. Secondly, the established outcome scales we used are validated and behavior based  
4 to reduce observer bias. Thirdly, we included a time point after surgery to evaluate the anxiety in  
5 children and ultimately confirmed that the individual cartoon video can reduce anxiety throughout  
6 the whole perioperative period.  
7  
8

9  
10 Several limitations related to this study should also be discussed. One limitation is that the outcomes  
11 were limited to the immediate period. Though it has been proved that the negative psychological  
12 impact of perioperative anxiety can stretch beyond the perioperative period and includes  
13 maladaptive postoperative behaviors, such as separation anxiety, nightmares and eating disorders<sup>[37-  
14 40]</sup>, it remains unclear whether interventions aimed at reducing preoperative anxiety would lead to a  
15 decrease in such behaviors. Besides, the sample size of study is relatively limited. We found no  
16 significant difference of adverse events between the two groups. The most likely reason is that we  
17 calculated the sample size based on the incidence of ED and anxiety. Thus, the number of children  
18 recruited may have been insufficient to detect the effects of the individual cartoon videos on  
19 postoperative adverse events. Thirdly, though the trained investigator was blinded to the group  
20 allocation before assessment, the blinding was impossible at some time points because cartoon video  
21 watching were visible to the investigator. As a result, observer bias may have influenced  
22 assessments of anxiety, emergence delirium, pain and compliance at induction of anesthesia.  
23  
24  
25  
26  
27

28 On the basis of our findings, future directions for further studies include longer postoperative  
29 follow-up, larger sample size and more application fields, including pediatric cardiovascular and  
30 cerebrovascular intervention therapies, radiological examinations and endoscopic examinations and  
31 treatments outside the operation room.  
32  
33

### 34 **Conclusion**

35 We concluded that the individual cartoon video was demonstrated to be an easy, effective and  
36 noninvasive modality for perioperative anxiety and emergence delirium in pediatric patients.  
37  
38

### 39 **Acknowledgements**

40 The authors thank all nurses and anesthetists for their participation in the study.  
41  
42

### 43 **Funding statement**

44 This work is supported by the Second Affiliated Hospital of Anhui Medical University and Hefei  
45 Research Institute of Chinese Academy of Sciences (202004), Anhui Provincial Health  
46 Commission (AHWJ2021a017), Education Department of Anhui Province (KJ2021ZD0030).  
47  
48  
49

### 50 **Assistance with the study**

51 none.  
52  
53

### 54 **Author contributions**

55 Xinyu Tang and Muchun Zhang contributed equally to this paper.  
56

57 All authors contributed to the study conception and design. Material preparation and data  
58 collection were performed by Xinchun Tao, Yamei Li, Yi Wang and Xin Wang. Data analysis was  
59 conducted by Xinyu Tang and Muchun Zhang. The first draft of the manuscript was written by  
60



Xinyu Tang and Muchun Zhang and all authors commented on previous versions of the manuscript. All authors read and approved the final manuscript.

### **Competing interests statement**

All authors declare that they have no competing interests.

### **Ethics Statement**

This clinical trial was approved by the Ethics Committee of the Second Hospital of Anhui Medical University (Reference number: YX2022-084 (F1)) and was registered at the Chinese Clinical Trial Registry (Reference number: ChiCTR2200062300). The study was performed in accordance with the Helsinki Declaration of 1964, and its later amendments. Written consent was obtained from parents (or guardians).

### **Data availability statement**

The data to support the results of this study is available from the corresponding author on reasonable request.

### **Prior presentation**

none

### **References**

- [1] BANCHS R J, LERMAN J. Preoperative anxiety management, emergence delirium, and postoperative behavior [J]. *Anesthesiol Clin*, 2014, 32(1): 1-23.
- [2] KAIN Z N, MAYES L C, O'CONNOR T Z, et al. Preoperative anxiety in children. Predictors and outcomes [J]. *Arch Pediatr Adolesc Med*, 1996, 150(12): 1238-45.
- [3] CHIENG Y J, CHAN W C, LIAM J L, et al. Exploring influencing factors of postoperative pain in school-age children undergoing elective surgery [J]. *J Spec Pediatr Nurs*, 2013, 18(3): 243-52.
- [4] KAIN Z N, CALDWELL-ANDREWS A A, MARANETS I, et al. Preoperative anxiety and emergence delirium and postoperative maladaptive behaviors [J]. *Anesth Analg*, 2004, 99(6): 1648-54.
- [5] KIM J E, JO B Y, OH H M, et al. High anxiety, young age and long waits increase the need for preoperative sedatives in children [J]. *J Int Med Res*, 2012, 40(4): 1381-9.

- 1  
2  
3  
4 [6] HEIKAL S, STUART G. Anxiolytic premedication for children [J]. BJA Education, 2020,  
5  
6 20(7): 220-5.  
7  
8  
9 [7] AGBAYANI C G, FORTIER M A, KAIN Z N. Non-pharmacological methods of reducing  
10  
11 perioperative anxiety in children [J]. BJA Educ, 2020, 20(12): 424-30.  
12  
13  
14 [8] CHOW C H, VAN LIESHOUT R J, SCHMIDT L A, et al. Systematic Review: Audiovisual  
15  
16 Interventions for Reducing Preoperative Anxiety in Children Undergoing Elective  
17  
18 Surgery [J]. J Pediatr Psychol, 2016, 41(2): 182-203.  
19  
20  
21 [9] LOW D K, PITTAWAY A P. The 'iPhone' induction - a novel use for the Apple iPhone  
22  
23 [J]. Paediatr Anaesth, 2008, 18(6): 573-4.  
24  
25  
26 [10] KENNEDY N, MCDONNELL J G. Cartoons and the art of paediatric inhalational  
27  
28 induction [J]. Anaesthesia, 2010, 65(12): 1233.  
29  
30  
31 [11] KERIMOGLU B, NEUMAN A, PAUL J, et al. Anesthesia induction using video glasses  
32  
33 as a distraction tool for the management of preoperative anxiety in children [J]. Anesth  
34  
35 Analg, 2013, 117(6): 1373-9.  
36  
37  
38 [12] MIFFLIN K A, HACKMANN T, CHORNEY J M. Streamed video clips to reduce anxiety  
39  
40 in children during inhaled induction of anesthesia [J]. Anesth Analg, 2012, 115(5):  
41  
42 1162-7.  
43  
44  
45 [13] FORTIER M A, BUNZLI E, WALTHALL J, et al. Web-based tailored intervention for  
46  
47 preparation of parents and children for outpatient surgery (WebTIPS): formative  
48  
49 evaluation and randomized controlled trial [J]. Anesth Analg, 2015, 120(4): 915-22.  
50  
51  
52 [14] TOURIGNY J, CHARTRAND J. [Evaluation of a preoperative virtual tour for parents  
53  
54 and children] [J]. Rech Soins Infirm, 2009, (96): 52-7.  
55  
56  
57  
58  
59  
60

- 1  
2  
3  
4 [15] LACQUIERE D A, COURTMAN S. Use of the iPad in paediatric anaesthesia [J].  
5  
6 Anaesthesia, 2011, 66(7): 629-30.  
7  
8  
9 [16] PATEL A, SCHIEBLE T, DAVIDSON M, et al. Distraction with a hand-held video game  
10  
11 reduces pediatric preoperative anxiety [J]. Paediatr Anaesth, 2006, 16(10): 1019-27.  
12  
13  
14 [17] LIGUORI S, STACCHINI M, CIOFI D, et al. Effectiveness of an App for Reducing  
15  
16 Preoperative Anxiety in Children: A Randomized Clinical Trial [J]. JAMA Pediatr, 2016,  
17  
18 170(8): e160533.  
19  
20  
21 [18] COHEN L L, BLOUNT R L, PANOPOULOS G. Nurse coaching and cartoon distraction:  
22  
23 an effective and practical intervention to reduce child, parent, and nurse distress during  
24  
25 immunizations [J]. J Pediatr Psychol, 1997, 22(3): 355-70.  
26  
27  
28 [19] MACLAREN J E, COHEN L L. A comparison of distraction strategies for venipuncture  
29  
30 distress in children [J]. J Pediatr Psychol, 2005, 30(5): 387-96.  
31  
32  
33 [20] JUNG M J, LIBAW J S, MA K, et al. Pediatric Distraction on Induction of Anesthesia  
34  
35 With Virtual Reality and Perioperative Anxiolysis: A Randomized Controlled Trial [J].  
36  
37 Anesth Analg, 2021, 132(3): 798-806.  
38  
39  
40 [21] HARTER V, BARKMANN C, WIESSNER C, et al. Effects of Educational Video on Pre-  
41  
42 operative Anxiety in Children - A Randomized Controlled Trial [J]. Front Pediatr, 2021,  
43  
44 9: 640236.  
45  
46  
47 [22] LEE J, LEE J, LIM H, et al. Cartoon distraction alleviates anxiety in children during  
48  
49 induction of anesthesia [J]. Anesth Analg, 2012, 115(5): 1168-73.  
50  
51  
52 [23] QUINTAO V C, CARLOS R V, KULIKOWSKI L D, et al. Association between adult and  
53  
54 child behavioral interactions with preoperative anxiety and emergence delirium [J].  
55  
56  
57  
58  
59  
60

- 1  
2  
3  
4 Paediatr Anaesth, 2022.  
5  
6  
7 [24] JENKINS B N, FORTIER M A, KAPLAN S H, et al. Development of a short version of  
8  
9 the modified Yale Preoperative Anxiety Scale [J]. Anesth Analg, 2014, 119(3): 643-50.  
10  
11 [25] KAIN Z N, MAYES L C, CICCHETTI D V, et al. The Yale Preoperative Anxiety Scale:  
12  
13 how does it compare with a "gold standard"? [J]. Anesth Analg, 1997, 85(4): 783-8.  
14  
15 [26] SIKICH N, LERMAN J. Development and psychometric evaluation of the pediatric  
16  
17 anesthesia emergence delirium scale [J]. Anesthesiology, 2004, 100(5): 1138-45.  
18  
19  
20  
21 [27] ALI M A, ABDELLATIF A A. Prevention of sevoflurane related emergence agitation in  
22  
23 children undergoing adenotonsillectomy: A comparison of dexmedetomidine and  
24  
25 propofol [J]. Saudi J Anaesth, 2013, 7(3): 296-300.  
26  
27  
28  
29 [28] SHI M, MIAO S, GU T, et al. Dexmedetomidine for the prevention of emergence  
30  
31 delirium and postoperative behavioral changes in pediatric patients with sevoflurane  
32  
33 anesthesia: a double-blind, randomized trial [J]. Drug Des Devel Ther, 2019, 13: 897-  
34  
35 905.  
36  
37  
38  
39 [29] CHEN J, LI W, HU X, et al. Emergence agitation after cataract surgery in children: a  
40  
41 comparison of midazolam, propofol and ketamine [J]. Paediatr Anaesth, 2010, 20(9):  
42  
43 873-9.  
44  
45  
46  
47 [30] RINGBLOM J, WAHLIN I, PROCZKOWSKA M. A psychometric evaluation of the  
48  
49 Pediatric Anesthesia Emergence Delirium scale [J]. Paediatr Anaesth, 2018, 28(4):  
50  
51 332-7.  
52  
53  
54  
55 [31] KAIN Z N, MAYES L C, WANG S M, et al. Parental presence during induction of  
56  
57 anesthesia versus sedative premedication: which intervention is more effective? [J].  
58  
59  
60

- 1  
2  
3  
4 Anesthesiology, 1998, 89(5): 1147-56; discussion 9A-10A.  
5  
6  
7 [32] CRELLIN D J, HARRISON D, SANTAMARIA N, et al. The Psychometric Properties of  
8  
9 the FLACC Scale Used to Assess Procedural Pain [J]. J Pain, 2018, 19(8): 862-72.  
10  
11 [33] CHANDLER J R, MYERS D, MEHTA D, et al. Emergence delirium in children: a  
12  
13 randomized trial to compare total intravenous anesthesia with propofol and remifentanyl  
14  
15 to inhalational sevoflurane anesthesia [J]. Paediatr Anaesth, 2013, 23(4): 309-15.  
16  
17  
18 [34] KIM J, KIM S Y, LEE J H, et al. Low-Dose Dexmedetomidine Reduces Emergence  
19  
20 Agitation after Desflurane Anaesthesia in Children Undergoing Strabismus Surgery [J].  
21  
22 Yonsei Med J, 2014, 55(2): 508-16.  
23  
24  
25 [35] MALARBI S, STARGATT R, HOWARD K, et al. Characterizing the behavior of children  
26  
27 emerging with delirium from general anesthesia [J]. Pediatric Anesthesia, 2011, 21(9):  
28  
29 942-50.  
30  
31  
32 [36] INAN G, INAL S. The Impact of 3 Different Distraction Techniques on the Pain and  
33  
34 Anxiety Levels of Children During Venipuncture: A Clinical Trial [J]. Clin J Pain, 2019,  
35  
36 35(2): 140-7.  
37  
38  
39 [37] FORTIER M A, DEL ROSARIO A M, ROSENBAUM A, et al. Beyond pain: predictors  
40  
41 of postoperative maladaptive behavior change in children [J]. Paediatr Anaesth, 2010,  
42  
43 20(5): 445-53.  
44  
45  
46 [38] FORTIER M A, DEL ROSARIO A M, MARTIN S R, et al. Perioperative anxiety in  
47  
48 children [J]. Paediatr Anaesth, 2010, 20(4): 318-22.  
49  
50  
51 [39] KAIN Z N, MAYES L C, CALDWELL-ANDREWS A A, et al. Preoperative anxiety,  
52  
53 postoperative pain, and behavioral recovery in young children undergoing surgery [J].  
54  
55  
56  
57  
58  
59  
60

Pediatrics, 2006, 118(2): 651-8.

- [40] KAIN Z N, WANG S M, MAYES L C, et al. Distress during the induction of anesthesia and postoperative behavioral outcomes [J]. Anesth Analg, 1999, 88(5): 1042-7.

**Table 1.** Demographic and surgical characteristics of the pediatric patients between individual cartoon video group and control group

Data are presented as frequency (percentage) or mean  $\pm$  SD (Standard Deviation).

<sup>a</sup>two independent samples t test

<sup>b</sup>Chi-Squared Test

**Table 2.** Anxiety occurrence and levels in pediatric patients between individual cartoon video group and control group

|                                      |                              | Individual cartoon video (n = 40) | Control (n = 40)   | P value  |
|--------------------------------------|------------------------------|-----------------------------------|--------------------|----------|
| Age (years) <sup>a</sup>             |                              | 5.75 $\pm$ 1.21                   | 5.68 $\pm$ 1.58    | 0.812    |
| Gender ( male ) [n (%)] <sup>b</sup> |                              | 17 (42.5)                         | 23 (57.5)          | 0.18     |
| Height (cm) <sup>a</sup>             |                              | 114.43 $\pm$ 9.24                 | 108.10 $\pm$ 11.92 | 0.319    |
| Weight (kg) <sup>a</sup>             |                              | 21.47 $\pm$ 6.18                  | 21.63 $\pm$ 5.26   | 0.271    |
| Surgery length ( min ) <sup>a</sup>  |                              | 34.45 $\pm$ 12.07                 | 34.63 $\pm$ 12.20  | 0.596    |
| Anesthesia length (min) <sup>a</sup> |                              | 47.35 $\pm$ 15.16                 | 46.23 $\pm$ 14.09  | 0.691    |
| Surgery [n (%)] <sup>b</sup>         |                              |                                   |                    | 0.875    |
|                                      | Adenoidectomy                | 15 (37.5)                         | 17 (42.5)          |          |
|                                      | Tonsillectomy                | 10 (25)                           | 10 (25)            |          |
|                                      | Adenoidectomy+ Tonsillectomy | 15 (37.5)                         | 13 (32.5)          |          |
|                                      |                              | Individual cartoon video (n=40)   | Control (n=40)     | P value  |
| Anxiety <sup>a</sup>                 |                              |                                   |                    | < 0.001* |
|                                      | T0 [n(%)]                    | 26(65)                            | 22(55)             |          |
|                                      | T1 [n(%)]                    | 8(20)                             | 32(80)             |          |

|                         |           |                     |                     |                      |
|-------------------------|-----------|---------------------|---------------------|----------------------|
|                         | T2 [n(%)] | 16(40)              | 36(90)              |                      |
|                         | T6 [n(%)] | 21(52.5)            | 35(87.5)            |                      |
| Peak_mYPAS <sup>b</sup> |           | 51.00 [41.67~60.89] | 64.14 [53.57~85.47] | < 0.001 <sup>†</sup> |

\*P<sub>time</sub>=0.023 \*P<sub>group</sub> < 0.001 \*P<sub>interaction</sub> < 0.001

Data are presented as frequency (percentage) or median [25th percentile to 75th percentile] as appropriate.

<sup>a</sup>Generalized Linear Mixed Model(GLMM) with logistic link was adjusted for age, gender, surgery type and length of surgery and anesthesia.

<sup>b</sup>Mann–Whitney U-test

mYPAS, Modified Yale Preoperative Anxiety Scale

T0, preoperative holding area

T1, entry to the operating room

T2, induction of anesthesia

T6, leaving the PACU

mYPAS > 40 is considered as the occurrence of anxiety.

Peak\_mYPAS refers to the highest score of mYPAS in the four time points of T0, T1, T2 and T6.

\*P < 0.05 is significant in GLMM with logistic link.

<sup>†</sup>P < 0.05 versus the control group.

**Table3.** Emergence delirium occurrence and levels in pediatric patients between individual cartoon video group and control group

|                 |           | Individual cartoon video (n=40) | Control (n=40) | P value |
|-----------------|-----------|---------------------------------|----------------|---------|
| ED <sup>a</sup> |           |                                 |                | 0.302   |
|                 | T3 [n(%)] | 22(55)                          | 31(77.5)       |         |
|                 | T4 [n(%)] | 13(32.5)                        | 22(55)         |         |

|                        |           |                    |                     |                    |
|------------------------|-----------|--------------------|---------------------|--------------------|
|                        | T5 [n(%)] | 9(22.5)            | 10(25)              |                    |
|                        | T6 [n(%)] | 6(15)              | 5(12.5)             |                    |
| Peak_PAED <sup>b</sup> |           | 12.00 [9.00~13.00] | 13.50 [10.00~15.00] | 0.016 <sup>†</sup> |

\*P<sub>time</sub> < 0.001 P<sub>group</sub>=0.142 P<sub>interaction</sub>=0.302

Data are presented as frequency (percentage) or median [25th percentile to 75th percentile] as appropriate.

<sup>a</sup>Generalized Linear Mixed Model(GLMM) with logistic link was adjusted for age, gender, surgery type and length of surgery and anesthesia.

<sup>b</sup>Mann–Whitney U-test

PAED, the Pediatric Anesthesia Emergence Delirium scale

T3, immediately after extubation

T4, arriving in the PACU

T5, 30 min after arriving in the PACU

T6, leaving the PACU

Peak\_PAED refers to the highest score of PAED in the four time points of T3, T4, T5 and T6.

PAED $\geq$ 10 is considered as the occurrence of emergence delirium.

\*P < 0.05 is significant in GLMM with logistic link.

<sup>†</sup>P < 0.05 versus the control group.

**Table 4.** Secondary outcomes of the pediatric patients between individual cartoon video group and control group

|  | Individual cartoon video<br>(n = 40) | Control<br>(n = 40) | P value |
|--|--------------------------------------|---------------------|---------|
|--|--------------------------------------|---------------------|---------|



|                                     |    |                  |                  |       |
|-------------------------------------|----|------------------|------------------|-------|
| FLACC <sup>a</sup>                  |    |                  |                  | 0.249 |
|                                     | T3 | 3.00 [1.25~4.75] | 3.50 [2.00~5.00] |       |
|                                     | T4 | 3.00 [1.00~5.00] | 3.50 [2.00~5.75] |       |
|                                     | T5 | 2.50 [1.00~4.00] | 3.00 [2.00~5.00] |       |
|                                     | T6 | 2.00 [1.00~3.75] | 3.00 [1.00~4.00] |       |
| ICC <sup>b</sup>                    |    | 2.00 [0.00~4.00] | 3.00 [1.25~4.00] | 0.11  |
| Adverse events <sup>c</sup> [n (%)] |    | 3 (7.5)          | 4 (10)           | 0.692 |

\*P<sub>time</sub>=0.010 P<sub>group</sub>=0.808 P<sub>interaction</sub>=0.249

Data are presented as frequency (percentage) or median [25th percentile to 75th percentile] as appropriate.

<sup>a</sup>Linear Mixed Model(LMM) was adjusted for age, gender, surgery type and length of surgery and anesthesia.

<sup>b</sup>Mann–Whitney U-test

<sup>c</sup>Chi-Squared Test

FLACC, Face, Legs, Activity, Consolability, Cry scale

T3, immediately after extubation

T4, arriving in the PACU

T5, 30 min after arriving in the PACU

T6, leaving the PACU

ICC, induction compliance checklist

Adverse events refer to severe hypoxemia, bronchospasm, postoperative bleeding, etc.

\*P < 0.05 is significant in LMM.

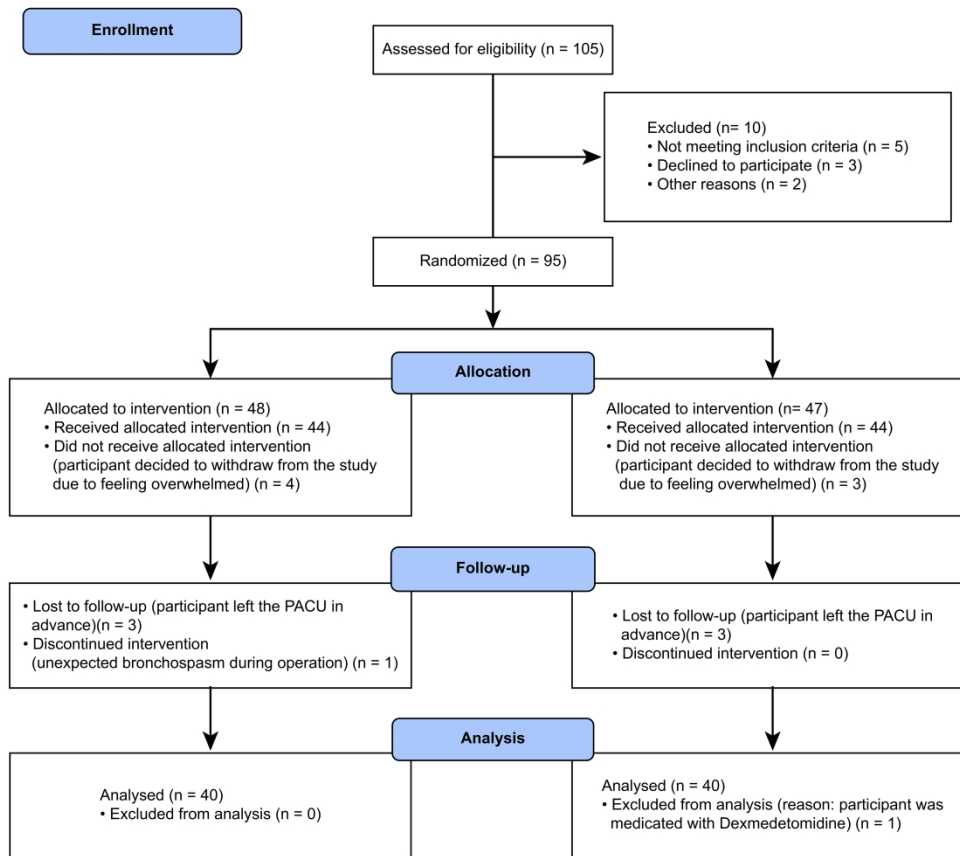

CONSORT flow diagram of the study.

179x157mm (580 x 580 DPI)

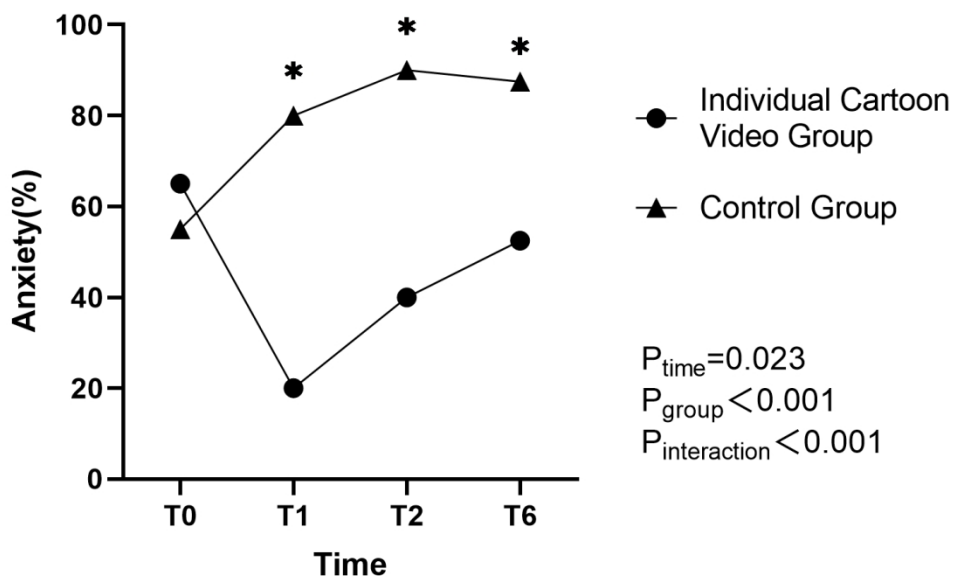

Figure2: Anxiety occurrence in pediatric patients in the perioperative period

□  $P < 0.001$  versus the control group

T0, preoperative holding area

T1, entry to the operating room

T2, induction of anesthesia

T6, leaving the PACU

mYPAS  $> 40$  is considered as the occurrence of anxiety.

132x84mm (300 x 300 DPI)
